# Supplementary material for: Genetic Polymorphisms of IFNG, IFNGR1, and Androgen Receptor and Chronic Prostatitis/Chronic Pelvic Pain Syndrome in a Chinese Han Population
Source: Dis Markers. 2021 Oct 4;2021:2898336. doi: 10.1155/2021/2898336 (PMC8505099; doi:10.1155/2021/2898336)
Supplement: Supplementary Materials — See Supplemental Figures 1-3 and Supplemental Tables 1-12 in the Supplementary Materials for comprehensive analysis. [file 2898336.f1.docx]

**Genetic Polymorphisms of *IFNG*, *IFNGR1,* and Androgen Receptor and Chronic Prostatitis/Chronic Pelvic Pain Syndrome in a Chinese Han Population**

Lei Chen1, 2, 3#, Junyi Chen1, 2, 3#, Fan Mo1, 2, 3, Zichen Bian1, 2, 3, Chen Jin1, 2, 3, Xianguo Chen1, 2, 3*, Chaozhao Liang1, 2, 3*

1Department of Urology, The First Affiliated Hospital of Anhui Medical University, Hefei 230022, Anhui, P.R. China

2Institute of Urology, Anhui Medical University, Hefei 230022, Anhui, P.R. China

3Anhui Province Key Laboratory of Genitourinary Diseases, Anhui Medical University, Hefei 230022, Anhui, P.R. China.

#These authors contributed equally to the work.

**Correspondence to** Xianguo Chen ([cxg7866186@126.com](mailto:cxg7866186@126.com)) & Chaozhao Liang ([liang_chaozhao@ahmu.edu.cn](mailto:liang_chaozhao@ahmu.edu.cn))

**Tel.:** +86 19955195611, and **Fax.:** +86 19955195611

**Address:** Jixi Road 218, Shushan District, Hefei City 230022, Anhui Province, People’s Republic of China.

**Supplemental Figure 1. The association between the 18 genotyped SNPs of *IFNG*, *IFNGR1*, and androgen receptor (*AR*) and NIH-CPSI scores in CP/CPPS patients.** No significant association between the 18 genotyped SNPs and NIH-CPSI scores was found in CP/CPPS patients (**A-R**). The Mann-Whitney U test and Kruskal-Wallis test were applied to analyze the non-normally distributed data between two and three groups, respectively.

**
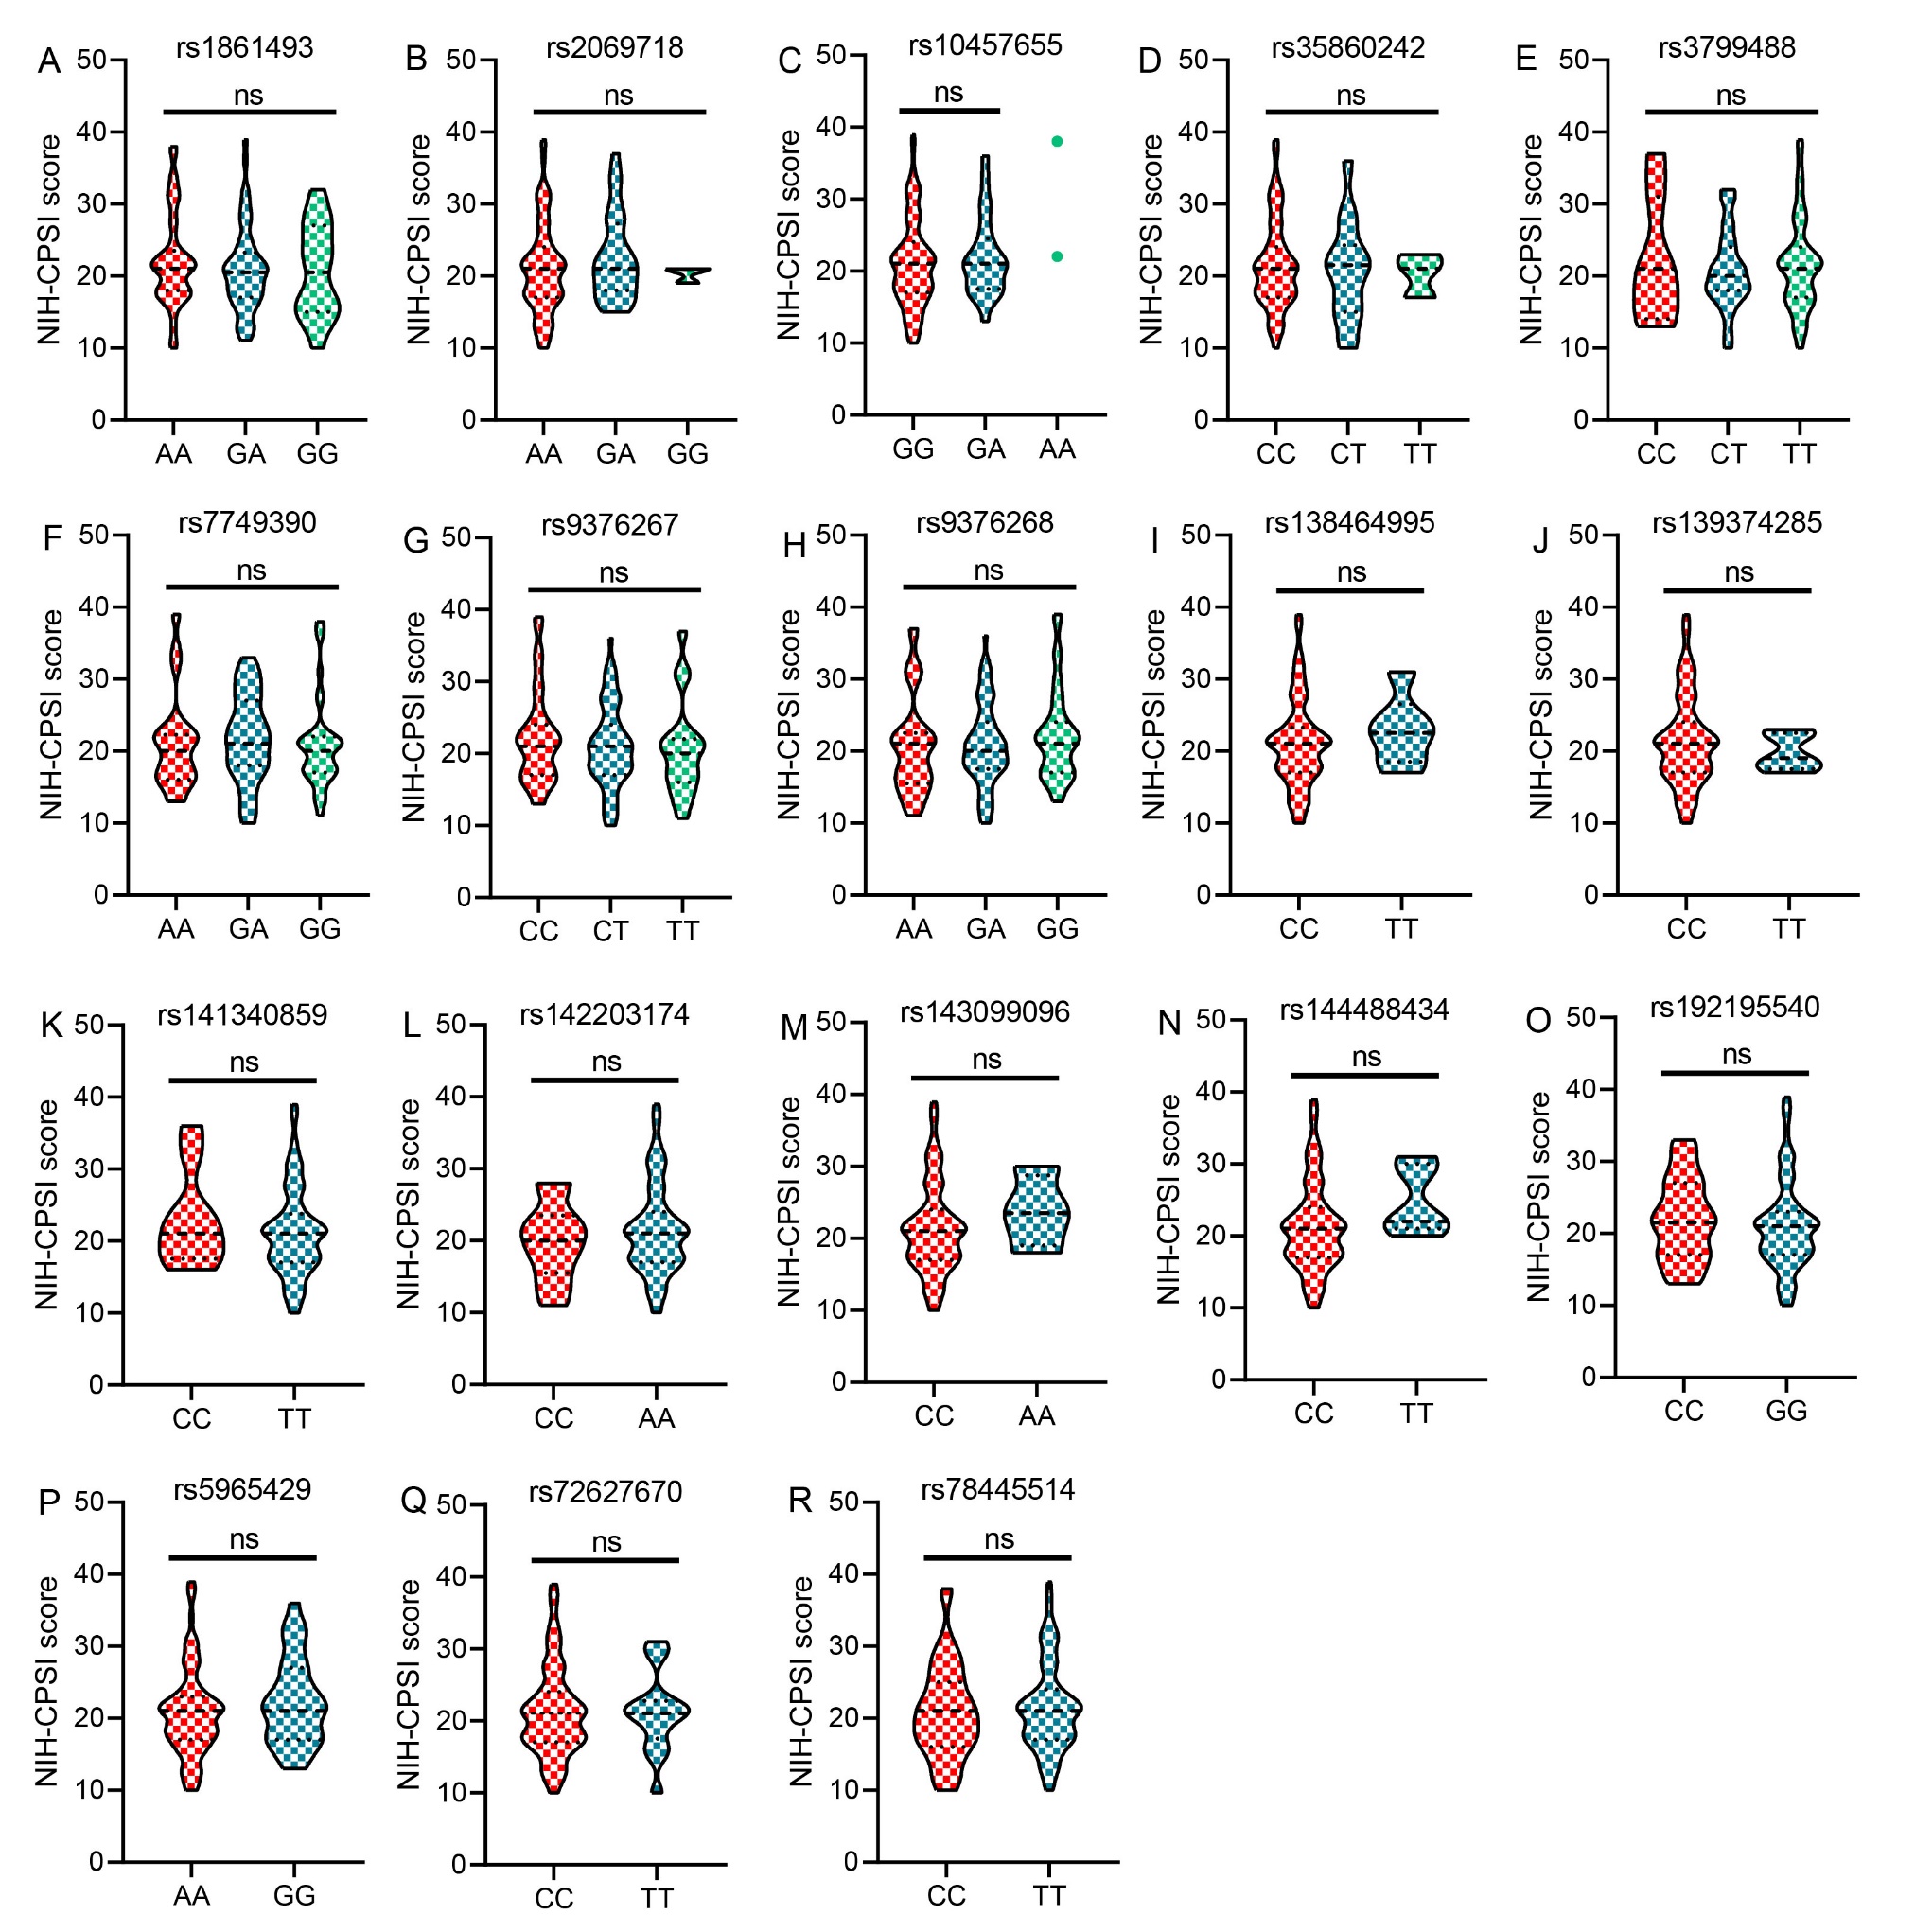
**

CP/CPPS: Chronic prostatitis/chronic pelvic pain syndrome; NIH-CPSI: National Institutes of Health Chronic Prostatitis Symptom Index; SNPs: single nucleotide polymorphisms;

**Supplemental Figure 2. The effects of the SNPs on the expression of their corresponding genes in whole blood.** The results of the GTEx database analysis revealed that rs1861493 (**A**), rs2069718 (**B**), rs7749390 (**D**), rs9376267 (**E**), and rs9376268 (**F**) might affect the expression of their corresponding genes, while rs3799488 (**C**), rs10457655 (**G**), and rs35860242 (**H**) did not affect the expression of the corresponding genes.

**
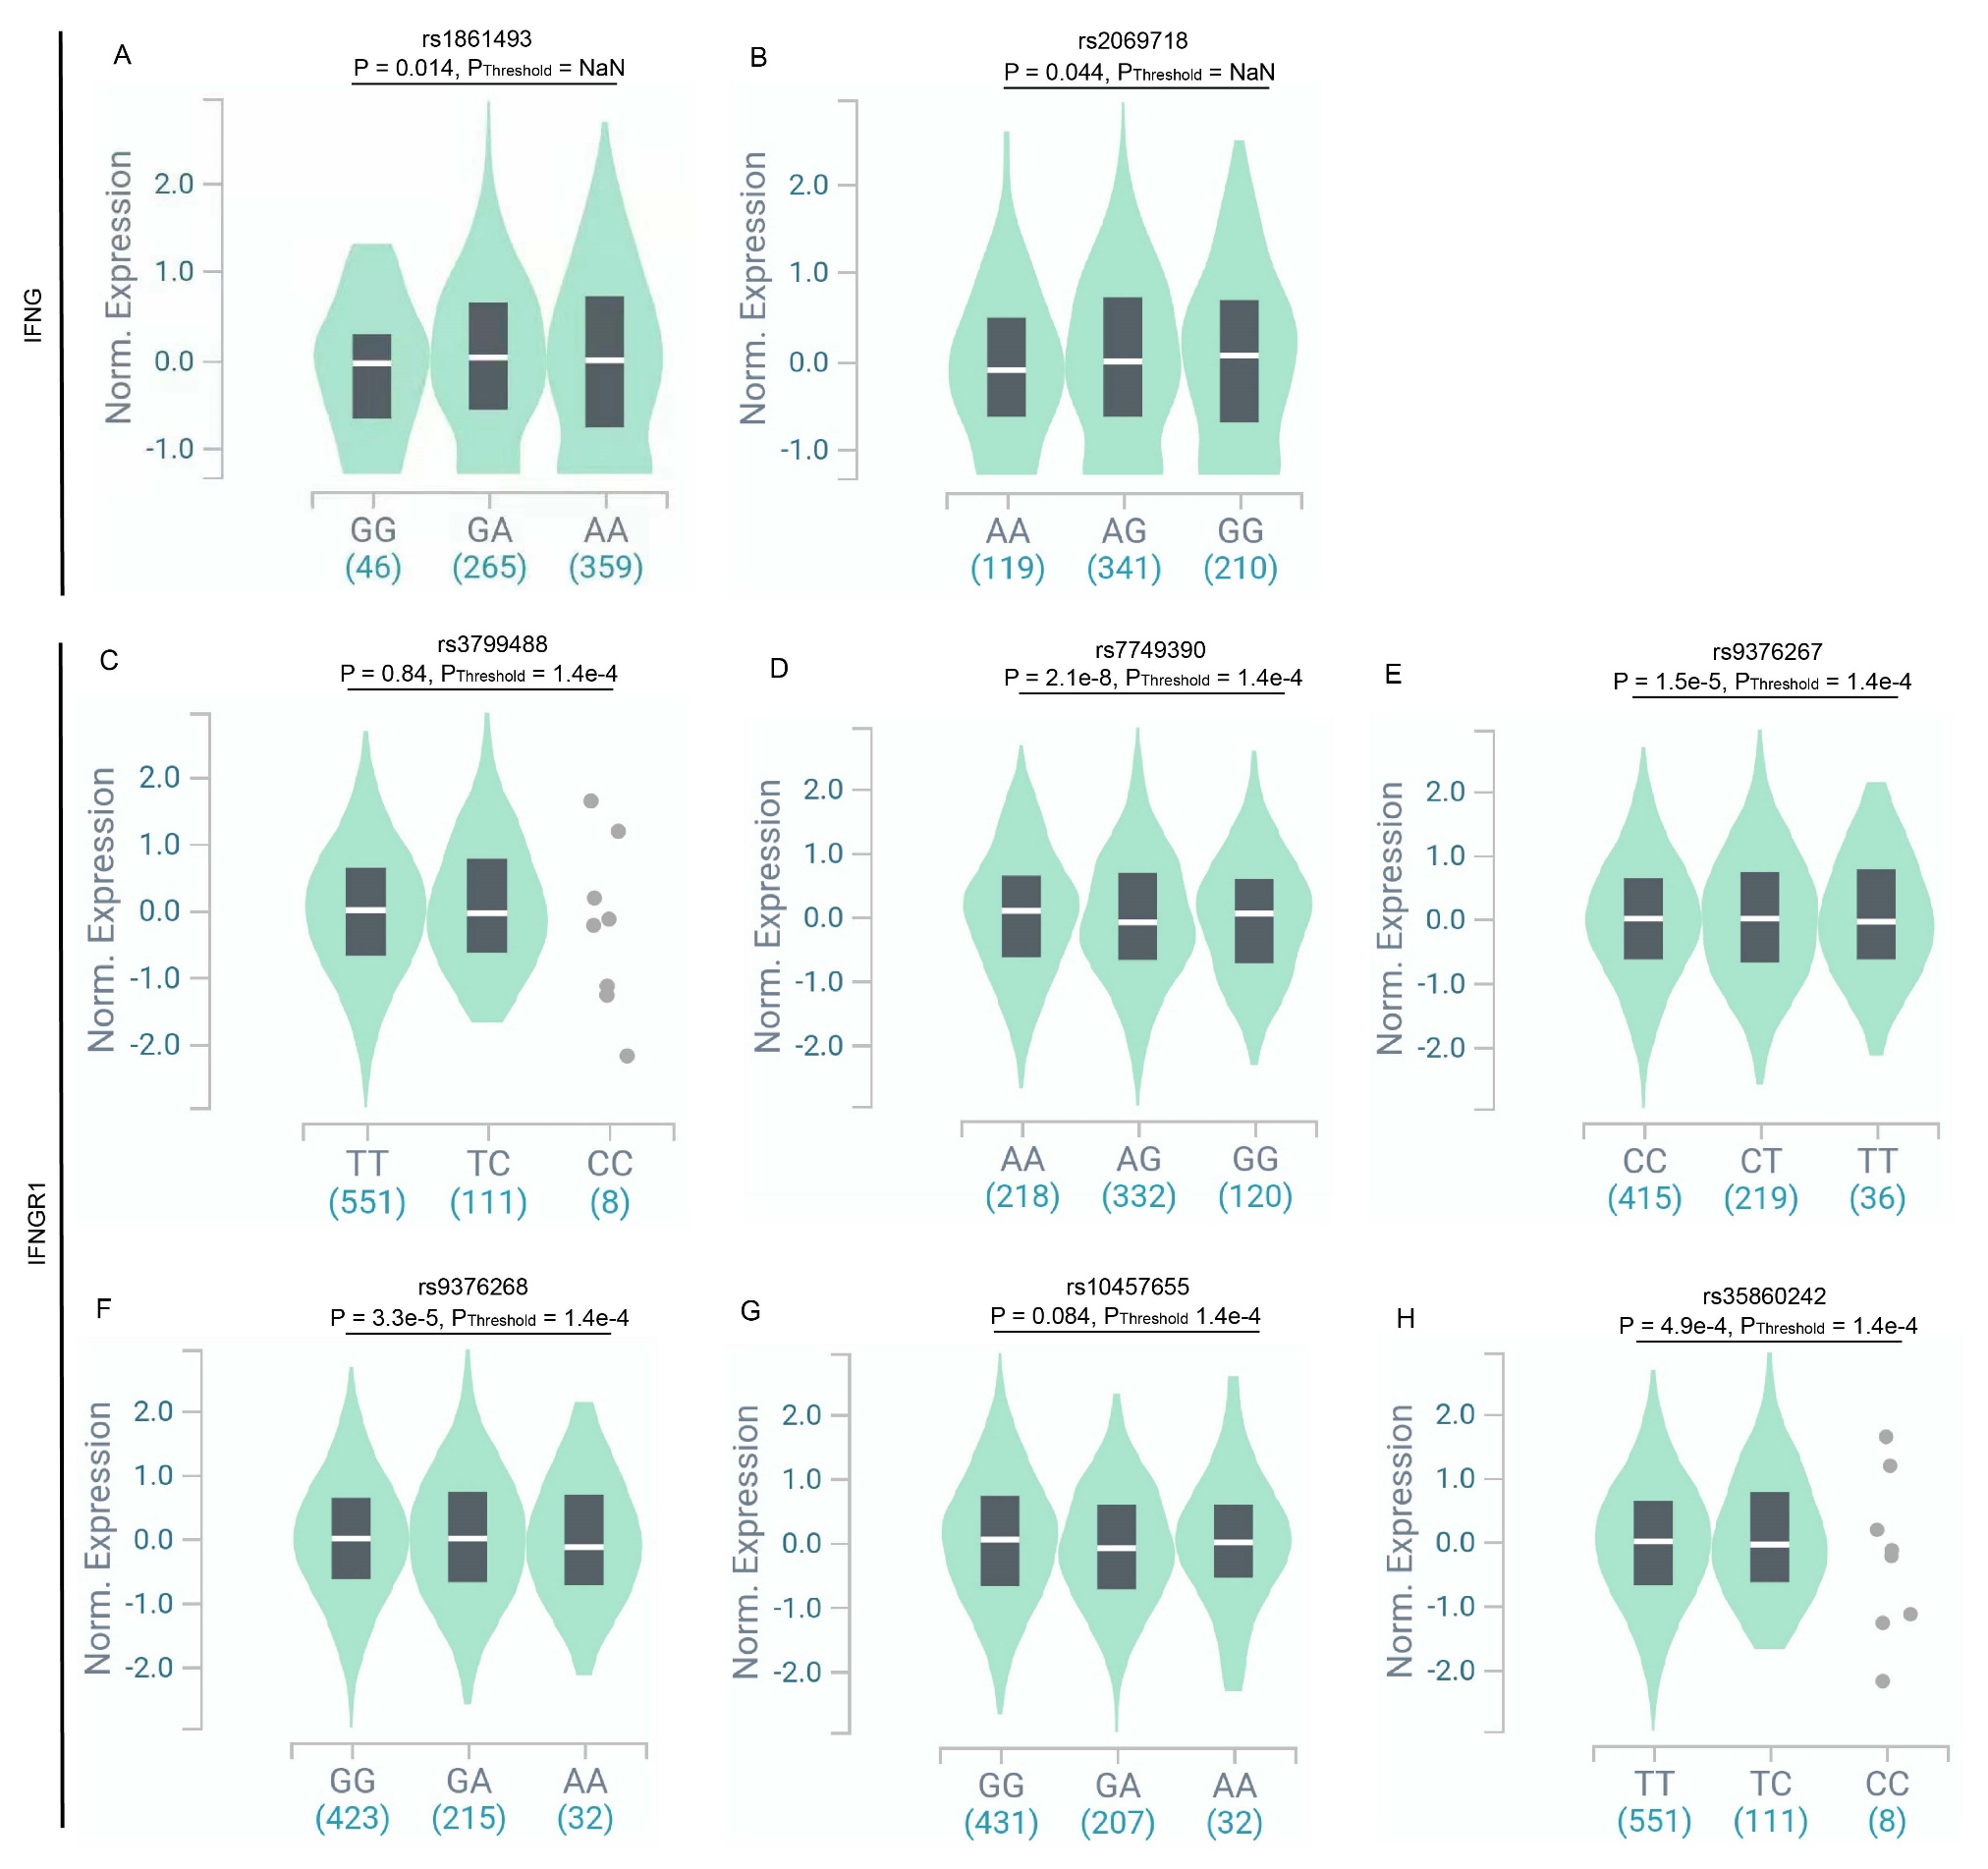
**

SNPs: single nucleotide polymorphisms;

**Supplemental Figure 3. The alterations of serum IFN-γ levels in CP/CPPS patients and healthy controls.** The serum IFN-γ levels were not elevated in CP/CPPS patients compared to healthy controls (**A**), and the genotypes of rs1861493 (**B**) and rs2069718 (**C**) were not associated with the serum IFN-γ levels in CP/CPPS patients. Data were presented as median (Q1, Q3) in the figure, and the Mann-Whitney U test was applied to analyze the non-normally distributed data.

**
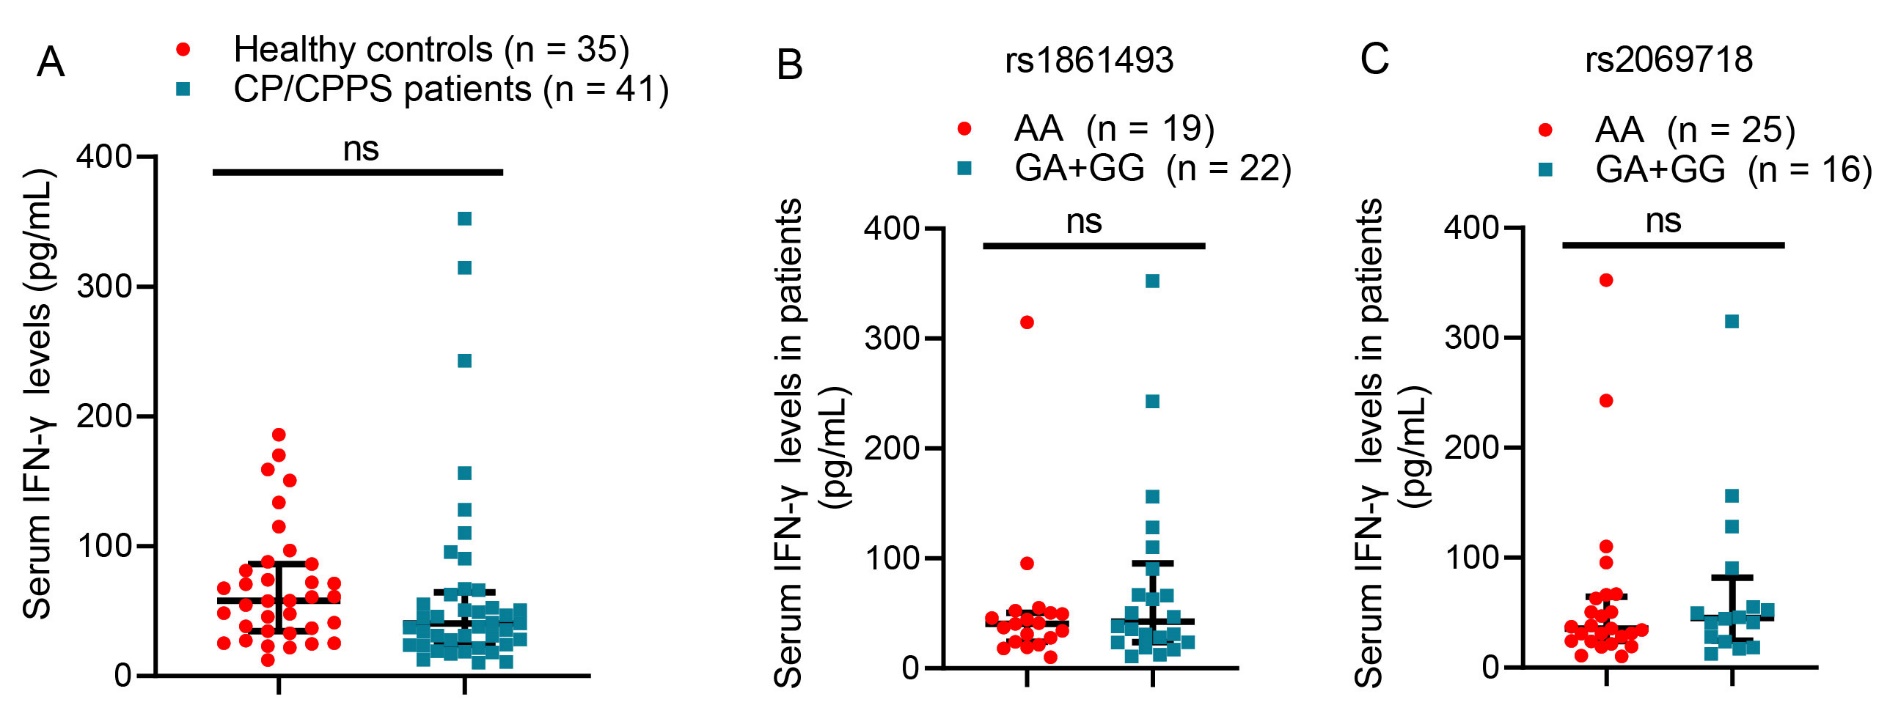
**

**Supplemental Table 1. Basic information of the SNPs in this study.**

| SNP | Chr. | Chr. Position | Gene | Ref mRNA | SNP Property | Length | Alleles | MAF | *P*HWE |
| --- | --- | --- | --- | --- | --- | --- | --- | --- | --- |
| rs1861493 | 12 | 68551196 | *IFNG* | NM_000619 | intron3 | 207 | A/G | 0.383 | 0.5807 |
| rs2069718 | 12 | 68550162 | *IFNG* | NM_000619 | intron3 | 286 | A/G | 0.119 | 0.9063 |
| rs7749390 | 6 | 137540370 | *IFNGR1* | NM_000416 | intron1 | 290 | G/A | 0.432 | 0.8456 |
| rs9376267 | 6 | 137531031 | *IFNGR1* | NM_000416 | intron1 | 103 | C/T | 0.440 | 0.5580 |
| rs10457655 | 6 | 137539810 | *IFNGR1* | NM_000416 | intron1 | 136 | G/A | 0.113 | 0.7647 |
| rs3799488 | 6 | 137519780 | *IFNGR1* | NM_000416 | intron6 | 216 | T/C | 0.253 | 0.3029 |
| rs35860242 | 6 | 137521772 | *IFNGR1* | NM_000416 | intron6 | 221 | C/T | 0.068 | 0.1681 |
| rs9376268 | 6 | 137532751 | *IFNGR1* | NM_000416 | intron1 | 343 | G/A | 0.407 | 0.5106 |
| rs192195540 | X | 66791836 | *AR* | NM_000044 | intron1 | 308 | G/C | 0.211 | NA |
| rs139374285 | X | 66914636 | *AR* | NM_000044 | intron3 | 400 | C/T | 0.045 | NA |
| rs72627670 | X | 66892219 | *AR* | NM_000044 | intron2 | 213 | C/T | 0.165 | NA |
| rs144488434 | X | 66891664 | *AR* | NM_000044 | intron2 | 290 | C/T | 0.070 | NA |
| rs138464995 | X | 66799594 | *AR* | NM_000044 | intron1 | 406 | C/T | 0.052 | NA |
| rs143099096 | X | 66875577 | *AR* | NM_000044 | intron2 | 352 | C/A | 0.037 | NA |
| rs78445514 | X | 66841609 | *AR* | NM_000044 | intron1 | 160 | T/C | 0.136 | NA |
| rs141340859 | X | 66898794 | *AR* | NM_000044 | intron2 | 106 | T/C | 0.062 | NA |
| rs142203174 | X | 66855153 | *AR* | NM_000044 | intron1 | 247 | A/C | 0.091 | NA |
| rs5965429 | X | 66828653 | *AR* | NM_000044 | intron1 | 303 | A/G | 0.301 | NA |

Chr: chromosome; HWE: Hardy-Weinberg equilibrium; MAF, minor allele frequency; NA, not applicable.

**Supplemental Table 2. The primers used in this study.**

| Gene | SNP |  | Primer sequence (5'‑3') |
| --- | --- | --- | --- |
| *IFNG* | rs2069718 | Forward | ACAACTTTTCCAGTACCCTGCCTTC |
|  |  | Reverse | GAAATGTGGTGAGTAGCCATAGTGTTC |
|  | rs1861493 | Forward | AGAGACTTGCAGTGGGGTGTCC |
|  |  | Reverse | CTCAGCCACCAAGGAACTGTGA |
| *IFNGR1* | rs10457655 | Forward | AGCCACGAACTGAGACCACGAT |
|  |  | Reverse | GTCTGGGTTTCTACTGCCCGAAG |
|  | rs35860242 | Forward | ACAAAGTCCTCATGGGCTCAGGT |
|  |  | Reverse | CCTGCCATCAATCAGTCAGTCTACC |
|  | rs3799488 | Forward | GACAACGGCTCTTCACAGACCA |
|  |  | Reverse | CCATTTGGTGGTCCATTACTTCAGA |
|  | rs7749390 | Forward | AAAGGCAACCGACGAGTTCAAA |
|  |  | Reverse | AGCAGCATGGCTCTCCTCTTTC |
|  | rs9376267 | Forward | GATTGAACAATGGAGCCACACATTC |
|  |  | Reverse | GTGAAGGCAAGAAGAAATGTTGGGTAT |
|  | rs9376268 | Forward | TCATGGCTCCCCTCAAACAAAT |
|  |  | Reverse | GAATGGCCATGGGAACTCTACAA |
| *AR* | rs138464995 | Forward | TTCCCTGTCCTCCTAGGCACAT |
|  |  | Reverse | TGGCTGAGGAAAGGCCAAAATA |
|  | rs142203174 | Forward | TTAAGGCAACCAAGACTTACAATGTGC |
|  |  | Reverse | CAAGAGGAATGGCAACCCAACA |
|  | rs192195540 | Forward | ACATTTGTATGTGGGCTCTACATTGC |
|  |  | Reverse | CCCCAGAAAAGGCAGAATCAGA |
|  | rs139374285 | Forward | GCCCACCTCCCCAACTTTACAT |
|  |  | Reverse | TCTACAGCCCGTCCTCACAACA |
|  | rs72627670 | Forward | CTCCAGCTCCATCCAGGTGTCT |
|  |  | Reverse | CACCACCAGAGAAAACCACTTTCA |
|  | rs144488434 | Forward | TTGTATAACGTGTAAGGAAGAGGTCCAC |
|  |  | Reverse | GAGATATAGACACGTGGAACAGAGCAG |
|  | rs143099096 | Forward | TGGAGGTATAGAGTGATTTCCCACCTAC |
|  |  | Reverse | GTGCTGTAATTTGATGAGGGACTGATT |
|  | rs78445514 | Forward | TGCTCACTCCAGTTCAATTAAATCAG |
|  |  | Reverse | TCAAAGTTGGATGGCCCTTATCA |
|  | rs141340859 | Forward | GGAGGCAGTTGACTGAGCTAGGAA |
|  |  | Reverse | TGGTCACCATGCTGTGCAATAG |
|  | rs5965429 | Forward | TGAAATTCAGACCTGCAATGAAGTG |
|  |  | Reverse | AATATTGGAAGGGTATGCCAAGAAGC |

**Supplemental Table 3. Predicted function of these 18 SNPs by RegulomeDB and HaploReg.**

| SNP | RegulomeDB |  | HaploReg | | | | |
| --- | --- | --- | --- | --- | --- | --- | --- |
| RegulomeDB score | Histone marker | DNase | Protein bound | Motifs changed | eQTL hits |
| rs1861493 | 5 |  | + | *+* | - | - | *+* |
| rs2069718 | 7 |  | + | *+* | - | - | *+* |
| rs7749390 | 4 |  | + | *+* | *+* | *+* | *+* |
| rs9376267 | 4 |  | + | *-* | - | *+* | *+* |
| rs10457655 | 2b |  | - | *+* | *+* | *+* | - |
| rs3799488 | 3a |  | - | *-* | - | *+* | - |
| rs35860242 | 5 |  | + | *+* | - | *+* | - |
| rs9376268 | 5 |  | + | *+* | - | *+* | *+* |
| rs192195540 | 6 |  | - | *-* | - | *+* | - |
| rs139374285 | 4 |  | + | *+* | - | *+* | - |
| rs72627670 | 7 |  | - | *-* | - | *+* | - |
| rs144488434 | 7 |  | - | *-* | - | *+* | - |
| rs138464995 | 7 |  | + | *-* | - | *+* | - |
| rs143099096 | 5 |  | + | *-* | - | *+* | - |
| rs78445514 | 7 |  | - | *-* | - | *+* | - |
| rs141340859 | 7 |  | - | *-* | - | *+* | - |
| rs142203174 | 5 |  | + | *-* | - | *+* | - |
| rs5965429 | 6 |  | + | *-* | - | - | - |

eQTL: expression quantitative trait loci.

‘

**Supplemental Table 4. Genetic models of SNPs and CP/CPPS in patients < 35 years by using logistic regression.**

| Gene / SNP | Model | Genotype | Crude OR (95%CI) | *P* | AIC | BIC | Adjusted OR (95%CI)a | *P* | AIC | BIC |
| --- | --- | --- | --- | --- | --- | --- | --- | --- | --- | --- |
| *IFNG* |  |  |  |  |  |  |  |  |  |  |
| rs2069718 | Codominant model | GA/AA | 0.65 (0.27, 1.60) | 0.35 | 172.1 | 177.7 | 0.68 (0.28, 1.68) | 0.40 | 170.8 | 179.2 |
| rs1861493 | Codominant model | GA/AA | 1.08 (0.49, 2.35) | 0.90 | 174.8 | 183.2 | 1.12 (0.51, 2.46) | 0.77 | 173 | 184.2 |
|  |  | GG/AA | 1.29 (0.42, 3.99) |  |  |  | 1.54 (0.48, 4.92) |  |  |  |
|  | Log-additive model | - | 1.12 (0.66, 1.91) | 0.67 | 172.8 | 178.4 | 1.21 (0.70, 2.09) | 0.50 | 171 | 179.4 |
| *IFNGR1* |  |  |  |  |  |  |  |  |  |  |
| rs10457655 | Codominant model | GA/GG | 0.92 (0.37, 2.26) | 0.23 | 172 | 180.4 | 0.87 (0.35, 2.18) | 0.36 | 171.4 | 182.7 |
|  | Log-additive model | - | 1.26 (0.58, 2.74) | 0.56 | 172.7 | 178.3 | 1.12 (0.50, 2.52) | 0.78 | 171.4 | 179.8 |
| rs35860242 | Codominant model | CT/CC | 1.58 (0.51, 4.88) | 0.079 | 169.9 | 178.3 | 1.66 (0.53, 5.18) | 0.09 | 168.7 | 179.9 |
|  | Log-additive model | - | 2.28 (0.90, 5.77) | 0.064 | 169.6 | 175.2 | 2.31 (0.89, 5.96) | 0.066 | 168.1 | 176.5 |
| rs3799488 | Codominant model | CT/TT | 1.08 (0.49, 2.39) | 0.95 | 174.9 | 183.3 | 1.33 (0.58, 3.05) | 0.73 | 172.9 | 184.1 |
|  |  | CC/TT | 0.86 (0.22, 3.47) |  |  |  | 0.82 (0.20, 3.40) |  |  |  |
|  | Log-additive model | - | 0.99 (0.56, 1.74) | 0.97 | 173 | 178.6 | 1.06 (0.59, 1.89) | 0.84 | 171.4 | 179.9 |
| rs7749390 | Codominant model | GA/GG | 0.87 (0.38, 1.97) | 0.61 | 174 | 182.4 | 0.96 (0.42, 2.21) | 0.60 | 172.5 | 183.7 |
|  |  | AA/GG | 0.60 (0.22, 1.67) |  |  |  | 0.62 (0.22, 1.74) |  |  |  |
|  | Log-additive model | - | 0.78 (0.47, 1.30) | 0.34 | 172.1 | 177.7 | 0.80 (0.48, 1.34) | 0.39 | 170.8 | 179.2 |
| rs9376267 | Codominant model | CT/CC | 1.14 (0.51, 2.55) | 0.86 | 173.2 | 181.6 | 1.27 (0.56, 2.90) | 0.81 | 171.8 | 182.9 |
|  |  | TT/CC | 1.34 (0.47, 3.88) |  |  |  | 1.35 (0.46, 3.95) |  |  |  |
|  | Log-additive model | - | 1.16 (0.69, 1.94) | 0.58 | 171.2 | 176.8 | 1.18 (0.70, 1.99) | 0.54 | 169.8 | 178.2 |
| rs9376268 | Codominant model | GA/GG | 0.98 (0.44, 2.17) | 0.64 | 172.6 | 181 | 1.09 (0.49, 2.47) | 0.71 | 171.5 | 182.7 |
|  |  | AA/GG | 1.59 (0.53, 4.77) |  |  |  | 1.59 (0.52, 4.84) |  |  |  |
|  | Log-additive model | - | 1.20 (0.71, 2.03) | 0.50 | 171.1 | 176.7 | 1.23 (0.72, 2.10) | 0.45 | 169.6 | 178 |
| *AR* |  |  |  |  |  |  |  |  |  |  |
| rs138464995 |  | TT/CC | 1.57 (0.34, 7.34) | 0.56 | 166.7 | 172.3 | 1.54 (0.33, 7.26) | 0.58 | 165.2 | 173.5 |
| rs142203174 |  | CC/AA | 1.08 (0.33, 3.54) | 0.90 | 173 | 178.6 | 1.11 (0.33, 3.72) | 0.86 | 171.4 | 179.9 |
| rs192195540 |  | CC/GG | 0.62 (0.28, 1.40) | 0.25 | 170.2 | 175.8 | 0.65 (0.29, 1.49) | 0.31 | 169.2 | 177.5 |
| rs139374285 |  | TT/CC | 1.63 (0.26, 10.14) | 0.59 | 172.7 | 178.3 | 1.45 (0.23, 9.18) | 0.69 | 171.3 | 179.7 |
| rs72627670 |  | TT/CC | 0.79 (0.26, 2.44) | 0.69 | 171.4 | 177 | 0.72 (0.22, 2.29) | 0.57 | 169.9 | 178.3 |
| rs144488434 |  | TT/CC | 0.33 (0.06, 1.72) | 0.16 | 171 | 176.6 | 0.23 (0.04, 1.40) | 0.084 | 168.5 | 176.9 |
| rs143099096 |  | AA/CC | 0.84 (0.22, 3.31) | 0.81 | 172.9 | 178.5 | 0.95 (0.24, 3.84) | 0.95 | 171.5 | 179.9 |
| rs78445514 |  | CC/TT | 2.96 (0.97, 9.00) | 0.056 | 169 | 174.6 | 2.94 (0.95, 9.06) | 0.06 | 167.6 | 176.1 |
| rs141340859 |  | CC/TT | 2.26 (0.40, 12.83) | 0.34 | 170.6 | 176.2 | 2.68 (0.46-15.65) | 0.26 | 168.9 | 177.3 |
| rs5965429 |  | GG/AA | 0.59 (0.28-1.28) | 0.18 | 168.2 | 173.8 | 0.64 (0.29-1.39) | 0.26 | 167.2 | 175.6 |

AIC, Akaike’s Information Criterion; BIC, Bayesian Information Criterion; CP/CPPS, chronic prostatitis/chronic pelvic pain syndrome; OR, odds ratio; SNPs, single nucleotide polymorphisms.

aAdjusted by age.

**Supplemental Table 5. Genetic models of SNPs and CP/CPPS in patients ≥ 35 years by using logistic regression.**

| Gene / SNP | Model | Genotype | Crude OR (95%CI) | *P* | AIC | BIC | Adjusted OR (95%CI)a | *P* | AIC | BIC |
| --- | --- | --- | --- | --- | --- | --- | --- | --- | --- | --- |
| *IFNG* |  |  |  |  |  |  |  |  |  |  |
| rs2069718 | Codominant model | GA/AA | 2.31 (0.93, 5.77) | 0.10 | 169.1 | 177.5 | 1.64 (0.62, 4.32) | 0.32 | 159.1 | 170.3 |
|  |  | GG/AA | 3.90 (0.39, 38.92) |  |  |  | 3.88 (0.36, 41.60) |  |  |  |
|  | Log-additive model | - | **2.18 (1.03**, **4.64)** | **0.034** | 167.2 | 172.8 | 1.77 (0.82, 3.81) | 0.14 | 157.2 | 165.6 |
| rs1861493 | Codominant model | GA/AA | 1.00 (0.46, 2.19) | 0.84 | 173.3 | 181.7 | 1.08 (0.47, 2.49) | 0.97 | 161.3 | 172.5 |
|  |  | GG/AA | 0.75 (0.27, 2.08) |  |  |  | 0.96 (0.33, 2.83) |  |  |  |
|  | Log-additive model | - | 0.89 (0.55, 1.45) | 0.64 | 171.4 | 177 | 1.00 (0.59, 1.68) | 0.99 | 159.4 | 167.8 |
| *IFNGR1* |  |  |  |  |  |  |  |  |  |  |
| rs10457655 | Codominant model | GA/GG | 1.17 (0.50, 2.76) | 0.72 | 171.5 | 177.1 | 1.04 (0.42, 2.58) | 0.93 | 159.4 | 167.8 |
| rs35860242 | Codominant model | CT/CC | 0.89 (0.28, 2.82) | 0.84 | 171.6 | 177.2 | 0.59 (0.17, 2.00) | 0.40 | 158.7 | 167 |
| rs3799488 | Codominant model | CT/TT | 1.21 (0.57, 2.55) | 0.40 | 171.8 | 180.2 | 1.13 (0.51, 2.51) | 0.48 | 159.9 | 171.1 |
|  |  | CC/TT | 0.46 (0.11, 1.93) |  |  |  | 0.46 (0.10, 2.03) |  |  |  |
|  | Log-additive model | - | 0.88 (0.50, 1.53) | 0.64 | 171.4 | 177 | 0.84 (0.47, 1.52) | 0.57 | 159.1 | 167.4 |
| rs7749390 | Codominant model | GA/GG | 0.84 (0.38, 1.88) | 0.36 | 171.6 | 180 | 0.95 (0.40, 2.21) | 0.23 | 158.4 | 169.6 |
|  |  | AA/GG | 1.80 (0.59, 5.55) |  |  |  | 2.45 (0.74, 8.19) |  |  |  |
|  | Log-additive model | - | 1.22 (0.72, 2.08) | 0.46 | 171.1 | 176.7 | 1.41 (0.80, 2.49) | 0.23 | 157.9 | 166.3 |
| rs9376267 | Codominant model | CT/CC | 1.03 (0.45, 2.39) | 0.32 | 171.4 | 179.8 | 0.93 (0.38, 2.28) | 0.18 | 158 | 169.2 |
|  |  | TT/CC | 0.50 (0.17, 1.50) |  |  |  | 0.38 (0.12, 1.23) |  |  |  |
|  | Log-additive model | - | 0.74 (0.43, 1.26) | 0.27 | 170.4 | 176 | 0.64 (0.36, 1.14) | 0.13 | 157.1 | 165.4 |
| rs9376268 | Codominant model | GA/GG | 1.19 (0.54, 2.63) | 0.33 | 171.4 | 179.8 | 0.99 (0.42, 2.31) | 0.26 | 158.7 | 169.8 |
|  |  | AA/GG | 0.53 (0.17, 1.67) |  |  |  | 0.40 (0.12, 1.36) |  |  |  |
|  | Log-additive model | - | 0.81 (0.48, 1.39) | 0.45 | 171.1 | 176.7 | 0.70 (0.39, 1.24) | 0.21 | 157.8 | 166.2 |
| *AR* |  |  |  |  |  |  |  |  |  |  |
| rs138464995 |  | TT/CC | 0.77 (0.12, 4.80) | 0.78 | 162.6 | 168.1 | 0.49 (0.07, 3.43) | 0.47 | 151.4 | 159.7 |
| rs142203174 |  | CC/AA | 1.64 (0.44, 6.14) | 0.46 | 171.1 | 176.7 | 3.28 (0.75, 14.28) | 0.10 | 156.7 | 165.1 |
| rs192195540 |  | CC/GG | 1.06 (0.39, 2.89) | 0.91 | 171.7 | 177.2 | 0.92 (0.32, 2.62) | 0.88 | 159.4 | 167.7 |
| rs139374285 |  | TT/CC | 0.51 (0.09, 2.89) | 0.43 | 171.1 | 176.6 | 0.57 (0.09, 3.56) | 0.54 | 159 | 167.4 |
| rs72627670 |  | TT/CC | 0.59 (0.24, 1.42) | 0.23 | 170.2 | 175.8 | 0.49 (0.19, 1.29) | 0.14 | 157.2 | 165.6 |
| rs144488434 |  | TT/CC | 0.50 (0.12, 2.10) | 0.33 | 170.7 | 176.3 | 0.33 (0.07, 1.56) | 0.15 | 157.3 | 165.7 |
| rs78445514 |  | CC/TT | 0.79 (0.27, 2.29) | 0.67 | 171.5 | 177.1 | 0.81 (0.27, 2.46) | 0.71 | 159.2 | 167.6 |
| rs141340859 |  | CC/TT | 1.34 (0.34, 5.26) | 0.67 | 171.5 | 177.1 | 1.11 (0.27, 4.48) | 0.89 | 159.4 | 167.7 |
| rs5965429 |  | GG/AA | 0.98 (0.43, 2.23) | 0.96 | 168.9 | 174.4 | 0.84 (0.36, 1.98) | 0.69 | 158 | 166.4 |

AIC, Akaike’s Information Criterion; BIC, Bayesian Information Criterion; CP/CPPS, chronic prostatitis/chronic pelvic pain syndrome; OR, odds ratio; SNPs, single nucleotide polymorphisms.

aAdjusted by age

**Supplemental Table 6. *IFNGR1* and *AR* haplotype frequencies and CP/CPPS.**

| Gene | Combinations of SNPs | Haplotype | Case, n (%) | Control, n(%) | OR (95% CI) | χ2 | *P* |
| --- | --- | --- | --- | --- | --- | --- | --- |
| *IFNGR1* | rs9376267-rs9376268 | CG | 133 (56.8) | 138 (55.2) | 1.07 (0.75, 1.53) | 0.132 | 0.717 |
|  |  | TA | 95 (40.6) | 102 (40.8) | 0.99 (0.69, 1.43) | 0.002 | 0.964 |
|  |  | TG | 6 (2.60) | 10 (4.00) | 0.63 (0.23, 1.77) | 0.780 | 0.377 |
| *AR* | rs5965429-rs192195540 | AG | 168 (73.0) | 166 (66.9) | 1.34 (0.90, 1.98) | 2.115 | 0.146 |
|  |  | GC | 44 (19.1) | 58 (23.4) | 0.78 (0.50, 1.20) | 1.288 | 0.256 |
|  |  | GG | 18 (7.8) | 24 (9.7) | 0.79 (0.42, 1.50) | 0.510 | 0.475 |

CP/CPPS, chronic prostatitis/chronic pelvic pain syndrome; OR, odds ratio; SNPs, single nucleotide polymorphisms.

| **Supplemental Table 7. The rs1861493 associated and interacted single nucleotide polymorphisms (SNPs) through three-dimensional (3D) chromatin looping (LD r2 > 0.8).** | | | | | | | | |
| --- | --- | --- | --- | --- | --- | --- | --- | --- |
| **SNP ID** | **Population** | **LD(r2)** | **Loop type** | **Loop start** | **Loop end** | **Distance** | **Cell type** | **Tissue** |
| rs10083034 | AMR | 0.98633 | Within loop | chr12:68400000-68410000 | chr12:68580000-68590000 | 180000 | H1-hESC | ESC |
| rs10083034 | EAS | 0.97205 | Within loop | chr12:68400000-68410000 | chr12:68580000-68590000 | 180000 | H1-hESC | ESC |
| rs10083034 | EUR | 0.98494 | Within loop | chr12:68400000-68410000 | chr12:68580000-68590000 | 180000 | H1-hESC | ESC |
| rs10083034 | SAS | 0.97633 | Within loop | chr12:68400000-68410000 | chr12:68580000-68590000 | 180000 | H1-hESC | ESC |
| rs10083165 | AMR | 0.98633 | Within loop | chr12:68400000-68410000 | chr12:68580000-68590000 | 180000 | H1-hESC | ESC |
| rs10083165 | EAS | 0.97205 | Within loop | chr12:68400000-68410000 | chr12:68580000-68590000 | 180000 | H1-hESC | ESC |
| rs10083165 | EUR | 0.98494 | Within loop | chr12:68400000-68410000 | chr12:68580000-68590000 | 180000 | H1-hESC | ESC |
| rs10083165 | SAS | 0.97633 | Within loop | chr12:68400000-68410000 | chr12:68580000-68590000 | 180000 | H1-hESC | ESC |
| rs10161291 | AMR | 0.98633 | Within loop | chr12:68400000-68410000 | chr12:68580000-68590000 | 180000 | H1-hESC | ESC |
| rs10161291 | EAS | 0.97205 | Within loop | chr12:68400000-68410000 | chr12:68580000-68590000 | 180000 | H1-hESC | ESC |
| rs10161291 | EUR | 0.98494 | Within loop | chr12:68400000-68410000 | chr12:68580000-68590000 | 180000 | H1-hESC | ESC |
| rs10161291 | SAS | 0.97633 | Within loop | chr12:68400000-68410000 | chr12:68580000-68590000 | 180000 | H1-hESC | ESC |
| rs10748098 | AMR | 0.94684 | Within loop | chr12:68400000-68410000 | chr12:68580000-68590000 | 180000 | H1-hESC | ESC |
| rs10748098 | EUR | 0.9413 | Within loop | chr12:68400000-68410000 | chr12:68580000-68590000 | 180000 | H1-hESC | ESC |
| rs10748098 | SAS | 0.922 | Within loop | chr12:68400000-68410000 | chr12:68580000-68590000 | 180000 | H1-hESC | ESC |
| rs10748099 | EUR | 0.9606 | Within loop | chr12:68400000-68410000 | chr12:68580000-68590000 | 180000 | H1-hESC | ESC |
| rs10748099 | SAS | 0.83731 | Within loop | chr12:68400000-68410000 | chr12:68580000-68590000 | 180000 | H1-hESC | ESC |
| rs10784679 | AMR | 0.98633 | Within loop | chr12:68400000-68410000 | chr12:68580000-68590000 | 180000 | H1-hESC | ESC |
| rs10784679 | EAS | 0.97205 | Within loop | chr12:68400000-68410000 | chr12:68580000-68590000 | 180000 | H1-hESC | ESC |
| rs10784679 | EUR | 0.98494 | Within loop | chr12:68400000-68410000 | chr12:68580000-68590000 | 180000 | H1-hESC | ESC |
| rs10784679 | SAS | 0.97633 | Within loop | chr12:68400000-68410000 | chr12:68580000-68590000 | 180000 | H1-hESC | ESC |
| rs10784683 | AMR | 0.94047 | Within loop | chr12:68400000-68410000 | chr12:68580000-68590000 | 180000 | H1-hESC | ESC |
| rs10784683 | EUR | 0.98003 | Within loop | chr12:68400000-68410000 | chr12:68580000-68590000 | 180000 | H1-hESC | ESC |
| rs10784683 | SAS | 0.94488 | Within loop | chr12:68400000-68410000 | chr12:68580000-68590000 | 180000 | H1-hESC | ESC |
| rs10784684 | AMR | 0.94684 | Within loop | chr12:68400000-68410000 | chr12:68580000-68590000 | 180000 | H1-hESC | ESC |
| rs10784684 | EUR | 0.98003 | Within loop | chr12:68400000-68410000 | chr12:68580000-68590000 | 180000 | H1-hESC | ESC |
| rs10784684 | SAS | 0.96056 | Within loop | chr12:68400000-68410000 | chr12:68580000-68590000 | 180000 | H1-hESC | ESC |
| rs10784688 | AMR | 0.93416 | Within loop | chr12:68400000-68410000 | chr12:68580000-68590000 | 180000 | H1-hESC | ESC |
| rs10784688 | EUR | 0.98003 | Within loop | chr12:68400000-68410000 | chr12:68580000-68590000 | 180000 | H1-hESC | ESC |
| rs10784688 | SAS | 0.87482 | Within loop | chr12:68400000-68410000 | chr12:68580000-68590000 | 180000 | H1-hESC | ESC |
| rs10878763 | AMR | 0.98633 | Within loop | chr12:68400000-68410000 | chr12:68580000-68590000 | 180000 | H1-hESC | ESC |
| rs10878763 | EAS | 1 | Within loop | chr12:68400000-68410000 | chr12:68580000-68590000 | 180000 | H1-hESC | ESC |
| rs10878763 | EUR | 1 | Within loop | chr12:68400000-68410000 | chr12:68580000-68590000 | 180000 | H1-hESC | ESC |
| rs10878763 | SAS | 0.9842 | Within loop | chr12:68400000-68410000 | chr12:68580000-68590000 | 180000 | H1-hESC | ESC |
| rs10878779 | AMR | 0.9095 | Within loop | chr12:68400000-68410000 | chr12:68580000-68590000 | 180000 | H1-hESC | ESC |
| rs10878779 | EUR | 0.97512 | Within loop | chr12:68400000-68410000 | chr12:68580000-68590000 | 180000 | H1-hESC | ESC |
| rs10878779 | SAS | 0.87482 | Within loop | chr12:68400000-68410000 | chr12:68580000-68590000 | 180000 | H1-hESC | ESC |
| rs1115577 | AMR | 0.95326 | Within loop | chr12:68400000-68410000 | chr12:68580000-68590000 | 180000 | H1-hESC | ESC |
| rs1115577 | EAS | 1 | Within loop | chr12:68400000-68410000 | chr12:68580000-68590000 | 180000 | H1-hESC | ESC |
| rs1115577 | EUR | 0.99499 | Within loop | chr12:68400000-68410000 | chr12:68580000-68590000 | 180000 | H1-hESC | ESC |
| rs1115577 | SAS | 0.97633 | Within loop | chr12:68400000-68410000 | chr12:68580000-68590000 | 180000 | H1-hESC | ESC |
| rs1118865 | AMR | 0.98633 | Within loop | chr12:68400000-68410000 | chr12:68580000-68590000 | 180000 | H1-hESC | ESC |
| rs1118865 | EAS | 0.98603 | Within loop | chr12:68400000-68410000 | chr12:68580000-68590000 | 180000 | H1-hESC | ESC |
| rs1118865 | EUR | 0.98494 | Within loop | chr12:68400000-68410000 | chr12:68580000-68590000 | 180000 | H1-hESC | ESC |
| rs1118865 | SAS | 0.97633 | Within loop | chr12:68400000-68410000 | chr12:68580000-68590000 | 180000 | H1-hESC | ESC |
| rs1118866 | AMR | 0.8975 | Within loop | chr12:68400000-68410000 | chr12:68580000-68590000 | 180000 | H1-hESC | ESC |
| rs1118866 | EAS | 0.98603 | Within loop | chr12:68400000-68410000 | chr12:68580000-68590000 | 180000 | H1-hESC | ESC |
| rs1118866 | EUR | 0.97995 | Within loop | chr12:68400000-68410000 | chr12:68580000-68590000 | 180000 | H1-hESC | ESC |
| rs1118866 | SAS | 0.96842 | Within loop | chr12:68400000-68410000 | chr12:68580000-68590000 | 180000 | H1-hESC | ESC |
| rs112212239 | EUR | 0.97025 | Within loop | chr12:68400000-68410000 | chr12:68580000-68590000 | 180000 | H1-hESC | ESC |
| rs112212239 | SAS | 0.83686 | Within loop | chr12:68400000-68410000 | chr12:68580000-68590000 | 180000 | H1-hESC | ESC |
| rs11390256 | AMR | 0.93416 | Within loop | chr12:68400000-68410000 | chr12:68580000-68590000 | 180000 | H1-hESC | ESC |
| rs11390256 | EUR | 0.98003 | Within loop | chr12:68400000-68410000 | chr12:68580000-68590000 | 180000 | H1-hESC | ESC |
| rs11390256 | SAS | 0.87482 | Within loop | chr12:68400000-68410000 | chr12:68580000-68590000 | 180000 | H1-hESC | ESC |
| rs11458654 | AMR | 1 | Within loop | chr12:68400000-68410000 | chr12:68580000-68590000 | 180000 | H1-hESC | ESC |
| rs11458654 | EUR | 0.98498 | Within loop | chr12:68400000-68410000 | chr12:68580000-68590000 | 180000 | H1-hESC | ESC |
| rs11458654 | SAS | 0.96842 | Within loop | chr12:68400000-68410000 | chr12:68580000-68590000 | 180000 | H1-hESC | ESC |
| rs1861494 | AMR | 0.93416 | Within loop | chr12:68400000-68410000 | chr12:68580000-68590000 | 180000 | H1-hESC | ESC |
| rs1861494 | EAS | 0.98141 | Within loop | chr12:68400000-68410000 | chr12:68580000-68590000 | 180000 | H1-hESC | ESC |
| rs1861494 | EUR | 0.99499 | Within loop | chr12:68400000-68410000 | chr12:68580000-68590000 | 180000 | H1-hESC | ESC |
| rs1861494 | SAS | 0.99214 | Within loop | chr12:68400000-68410000 | chr12:68580000-68590000 | 180000 | H1-hESC | ESC |
| rs2041863 | AMR | 0.98633 | Within loop | chr12:68400000-68410000 | chr12:68580000-68590000 | 180000 | H1-hESC | ESC |
| rs2041863 | EAS | 0.97209 | Within loop | chr12:68400000-68410000 | chr12:68580000-68590000 | 180000 | H1-hESC | ESC |
| rs2041863 | EUR | 0.98997 | Within loop | chr12:68400000-68410000 | chr12:68580000-68590000 | 180000 | H1-hESC | ESC |
| rs2041863 | SAS | 0.9842 | Within loop | chr12:68400000-68410000 | chr12:68580000-68590000 | 180000 | H1-hESC | ESC |
| rs2098394 | AMR | 0.94684 | Within loop | chr12:68400000-68410000 | chr12:68580000-68590000 | 180000 | H1-hESC | ESC |
| rs2098394 | EUR | 0.98003 | Within loop | chr12:68400000-68410000 | chr12:68580000-68590000 | 180000 | H1-hESC | ESC |
| rs2098394 | SAS | 0.96056 | Within loop | chr12:68400000-68410000 | chr12:68580000-68590000 | 180000 | H1-hESC | ESC |
| rs2111059 | AMR | 0.98633 | Within loop | chr12:68400000-68410000 | chr12:68580000-68590000 | 180000 | H1-hESC | ESC |
| rs2111059 | EAS | 0.99533 | Within loop | chr12:68400000-68410000 | chr12:68580000-68590000 | 180000 | H1-hESC | ESC |
| rs2111059 | EUR | 1 | Within loop | chr12:68400000-68410000 | chr12:68580000-68590000 | 180000 | H1-hESC | ESC |
| rs2111059 | SAS | 0.97633 | Within loop | chr12:68400000-68410000 | chr12:68580000-68590000 | 180000 | H1-hESC | ESC |
| rs2193045 | AMR | 0.92172 | Within loop | chr12:68400000-68410000 | chr12:68580000-68590000 | 180000 | H1-hESC | ESC |
| rs2193045 | EAS | 0.97205 | Within loop | chr12:68400000-68410000 | chr12:68580000-68590000 | 180000 | H1-hESC | ESC |
| rs2193045 | EUR | 0.98495 | Within loop | chr12:68400000-68410000 | chr12:68580000-68590000 | 180000 | H1-hESC | ESC |
| rs2193045 | SAS | 0.9842 | Within loop | chr12:68400000-68410000 | chr12:68580000-68590000 | 180000 | H1-hESC | ESC |
| rs2193048 | AMR | 0.95326 | Within loop | chr12:68400000-68410000 | chr12:68580000-68590000 | 180000 | H1-hESC | ESC |
| rs2193048 | EAS | 0.97205 | Within loop | chr12:68400000-68410000 | chr12:68580000-68590000 | 180000 | H1-hESC | ESC |
| rs2193048 | EUR | 0.98495 | Within loop | chr12:68400000-68410000 | chr12:68580000-68590000 | 180000 | H1-hESC | ESC |
| rs2193048 | SAS | 0.9842 | Within loop | chr12:68400000-68410000 | chr12:68580000-68590000 | 180000 | H1-hESC | ESC |
| rs2193049 | AMR | 0.90348 | Within loop | chr12:68400000-68410000 | chr12:68580000-68590000 | 180000 | H1-hESC | ESC |
| rs2193049 | EAS | 0.92889 | Within loop | chr12:68400000-68410000 | chr12:68580000-68590000 | 180000 | H1-hESC | ESC |
| rs2193049 | EUR | 0.96569 | Within loop | chr12:68400000-68410000 | chr12:68580000-68590000 | 180000 | H1-hESC | ESC |
| rs2193049 | SAS | 0.95372 | Within loop | chr12:68400000-68410000 | chr12:68580000-68590000 | 180000 | H1-hESC | ESC |
| rs2193050 | AMR | 0.98633 | Within loop | chr12:68400000-68410000 | chr12:68580000-68590000 | 180000 | H1-hESC | ESC |
| rs2193050 | EAS | 1 | Within loop | chr12:68400000-68410000 | chr12:68580000-68590000 | 180000 | H1-hESC | ESC |
| rs2193050 | EUR | 1 | Within loop | chr12:68400000-68410000 | chr12:68580000-68590000 | 180000 | H1-hESC | ESC |
| rs2193050 | SAS | 0.99209 | Within loop | chr12:68400000-68410000 | chr12:68580000-68590000 | 180000 | H1-hESC | ESC |
| rs2216163 | AMR | 0.98633 | Within loop | chr12:68400000-68410000 | chr12:68580000-68590000 | 180000 | H1-hESC | ESC |
| rs2216163 | EAS | 0.97205 | Within loop | chr12:68400000-68410000 | chr12:68580000-68590000 | 180000 | H1-hESC | ESC |
| rs2216163 | EUR | 0.98494 | Within loop | chr12:68400000-68410000 | chr12:68580000-68590000 | 180000 | H1-hESC | ESC |
| rs2216163 | SAS | 0.9842 | Within loop | chr12:68400000-68410000 | chr12:68580000-68590000 | 180000 | H1-hESC | ESC |
| rs2870952 | AMR | 0.94047 | Within loop | chr12:68400000-68410000 | chr12:68580000-68590000 | 180000 | H1-hESC | ESC |
| rs2870952 | EUR | 0.98003 | Within loop | chr12:68400000-68410000 | chr12:68580000-68590000 | 180000 | H1-hESC | ESC |
| rs2870952 | SAS | 0.96842 | Within loop | chr12:68400000-68410000 | chr12:68580000-68590000 | 180000 | H1-hESC | ESC |
| rs2870953 | AMR | 0.95326 | Within loop | chr12:68400000-68410000 | chr12:68580000-68590000 | 180000 | H1-hESC | ESC |
| rs2870953 | EAS | 1 | Within loop | chr12:68400000-68410000 | chr12:68580000-68590000 | 180000 | H1-hESC | ESC |
| rs2870953 | EUR | 0.99499 | Within loop | chr12:68400000-68410000 | chr12:68580000-68590000 | 180000 | H1-hESC | ESC |
| rs2870953 | SAS | 0.9842 | Within loop | chr12:68400000-68410000 | chr12:68580000-68590000 | 180000 | H1-hESC | ESC |
| rs2904536 | AMR | 1 | Within loop | chr12:68400000-68410000 | chr12:68580000-68590000 | 180000 | H1-hESC | ESC |
| rs2904536 | EUR | 0.98498 | Within loop | chr12:68400000-68410000 | chr12:68580000-68590000 | 180000 | H1-hESC | ESC |
| rs2904536 | SAS | 0.96062 | Within loop | chr12:68400000-68410000 | chr12:68580000-68590000 | 180000 | H1-hESC | ESC |
| rs3181034 | AMR | 0.95326 | Within loop | chr12:68400000-68410000 | chr12:68580000-68590000 | 180000 | H1-hESC | ESC |
| rs3181034 | EAS | 1 | Within loop | chr12:68400000-68410000 | chr12:68580000-68590000 | 180000 | H1-hESC | ESC |
| rs3181034 | EUR | 0.99499 | Within loop | chr12:68400000-68410000 | chr12:68580000-68590000 | 180000 | H1-hESC | ESC |
| rs3181034 | SAS | 0.99209 | Within loop | chr12:68400000-68410000 | chr12:68580000-68590000 | 180000 | H1-hESC | ESC |
| rs4421820 | AMR | 0.92172 | Within loop | chr12:68400000-68410000 | chr12:68580000-68590000 | 180000 | H1-hESC | ESC |
| rs4421820 | EAS | 0.86641 | Within loop | chr12:68400000-68410000 | chr12:68580000-68590000 | 180000 | H1-hESC | ESC |
| rs4421820 | EUR | 0.9606 | Within loop | chr12:68400000-68410000 | chr12:68580000-68590000 | 180000 | H1-hESC | ESC |
| rs4913275 | AMR | 1 | Within loop | chr12:68400000-68410000 | chr12:68580000-68590000 | 180000 | H1-hESC | ESC |
| rs4913275 | EUR | 0.98498 | Within loop | chr12:68400000-68410000 | chr12:68580000-68590000 | 180000 | H1-hESC | ESC |
| rs4913275 | SAS | 0.96842 | Within loop | chr12:68400000-68410000 | chr12:68580000-68590000 | 180000 | H1-hESC | ESC |
| rs4913278 | AMR | 0.93416 | Within loop | chr12:68400000-68410000 | chr12:68580000-68590000 | 180000 | H1-hESC | ESC |
| rs4913278 | EUR | 0.98003 | Within loop | chr12:68400000-68410000 | chr12:68580000-68590000 | 180000 | H1-hESC | ESC |
| rs4913278 | SAS | 0.87482 | Within loop | chr12:68400000-68410000 | chr12:68580000-68590000 | 180000 | H1-hESC | ESC |
| rs4913407 | AMR | 0.9663 | Within loop | chr12:68400000-68410000 | chr12:68580000-68590000 | 180000 | H1-hESC | ESC |
| rs4913407 | EUR | 0.98498 | Within loop | chr12:68400000-68410000 | chr12:68580000-68590000 | 180000 | H1-hESC | ESC |
| rs4913407 | SAS | 0.94488 | Within loop | chr12:68400000-68410000 | chr12:68580000-68590000 | 180000 | H1-hESC | ESC |
| rs4913408 | AMR | 1 | Within loop | chr12:68400000-68410000 | chr12:68580000-68590000 | 180000 | H1-hESC | ESC |
| rs4913408 | EUR | 0.97995 | Within loop | chr12:68400000-68410000 | chr12:68580000-68590000 | 180000 | H1-hESC | ESC |
| rs4913408 | SAS | 0.94488 | Within loop | chr12:68400000-68410000 | chr12:68580000-68590000 | 180000 | H1-hESC | ESC |
| rs4913411 | AMR | 0.9663 | Within loop | chr12:68400000-68410000 | chr12:68580000-68590000 | 180000 | H1-hESC | ESC |
| rs4913411 | EUR | 0.98498 | Within loop | chr12:68400000-68410000 | chr12:68580000-68590000 | 180000 | H1-hESC | ESC |
| rs4913411 | SAS | 0.96842 | Within loop | chr12:68400000-68410000 | chr12:68580000-68590000 | 180000 | H1-hESC | ESC |
| rs4913412 | AMR | 0.9663 | Within loop | chr12:68400000-68410000 | chr12:68580000-68590000 | 180000 | H1-hESC | ESC |
| rs4913412 | EUR | 0.98498 | Within loop | chr12:68400000-68410000 | chr12:68580000-68590000 | 180000 | H1-hESC | ESC |
| rs4913412 | SAS | 0.96842 | Within loop | chr12:68400000-68410000 | chr12:68580000-68590000 | 180000 | H1-hESC | ESC |
| rs4913415 | AMR | 0.95975 | Within loop | chr12:68400000-68410000 | chr12:68580000-68590000 | 180000 | H1-hESC | ESC |
| rs4913415 | EUR | 0.97512 | Within loop | chr12:68400000-68410000 | chr12:68580000-68590000 | 180000 | H1-hESC | ESC |
| rs4913415 | SAS | 0.86711 | Within loop | chr12:68400000-68410000 | chr12:68580000-68590000 | 180000 | H1-hESC | ESC |
| rs55883501 | AMR | 0.94047 | Within loop | chr12:68400000-68410000 | chr12:68580000-68590000 | 180000 | H1-hESC | ESC |
| rs55883501 | EUR | 0.98003 | Within loop | chr12:68400000-68410000 | chr12:68580000-68590000 | 180000 | H1-hESC | ESC |
| rs55883501 | SAS | 0.95292 | Within loop | chr12:68400000-68410000 | chr12:68580000-68590000 | 180000 | H1-hESC | ESC |
| rs57781022 | AMR | 0.96573 | Within loop | chr12:68400000-68410000 | chr12:68580000-68590000 | 180000 | H1-hESC | ESC |
| rs57781022 | EAS | 0.977 | Within loop | chr12:68400000-68410000 | chr12:68580000-68590000 | 180000 | H1-hESC | ESC |
| rs57781022 | EUR | 0.96093 | Within loop | chr12:68400000-68410000 | chr12:68580000-68590000 | 180000 | H1-hESC | ESC |
| rs57781022 | SAS | 0.93188 | Within loop | chr12:68400000-68410000 | chr12:68580000-68590000 | 180000 | H1-hESC | ESC |
| rs6421226 | AMR | 0.9663 | Within loop | chr12:68400000-68410000 | chr12:68580000-68590000 | 180000 | H1-hESC | ESC |
| rs6421226 | EUR | 0.98498 | Within loop | chr12:68400000-68410000 | chr12:68580000-68590000 | 180000 | H1-hESC | ESC |
| rs6421226 | SAS | 0.96842 | Within loop | chr12:68400000-68410000 | chr12:68580000-68590000 | 180000 | H1-hESC | ESC |
| rs6421227 | AMR | 1 | Within loop | chr12:68400000-68410000 | chr12:68580000-68590000 | 180000 | H1-hESC | ESC |
| rs6421227 | EUR | 0.98498 | Within loop | chr12:68400000-68410000 | chr12:68580000-68590000 | 180000 | H1-hESC | ESC |
| rs6421227 | SAS | 0.96842 | Within loop | chr12:68400000-68410000 | chr12:68580000-68590000 | 180000 | H1-hESC | ESC |
| rs6581790 | AMR | 0.98633 | Within loop | chr12:68400000-68410000 | chr12:68580000-68590000 | 180000 | H1-hESC | ESC |
| rs6581790 | EAS | 0.97205 | Within loop | chr12:68400000-68410000 | chr12:68580000-68590000 | 180000 | H1-hESC | ESC |
| rs6581790 | EUR | 0.98997 | Within loop | chr12:68400000-68410000 | chr12:68580000-68590000 | 180000 | H1-hESC | ESC |
| rs6581790 | SAS | 0.9842 | Within loop | chr12:68400000-68410000 | chr12:68580000-68590000 | 180000 | H1-hESC | ESC |
| rs6581792 | AMR | 0.98633 | Within loop | chr12:68400000-68410000 | chr12:68580000-68590000 | 180000 | H1-hESC | ESC |
| rs6581792 | EAS | 1 | Within loop | chr12:68400000-68410000 | chr12:68580000-68590000 | 180000 | H1-hESC | ESC |
| rs6581792 | EUR | 1 | Within loop | chr12:68400000-68410000 | chr12:68580000-68590000 | 180000 | H1-hESC | ESC |
| rs6581792 | SAS | 0.97633 | Within loop | chr12:68400000-68410000 | chr12:68580000-68590000 | 180000 | H1-hESC | ESC |
| rs6581793 | AMR | 0.92172 | Within loop | chr12:68400000-68410000 | chr12:68580000-68590000 | 180000 | H1-hESC | ESC |
| rs6581793 | EAS | 1 | Within loop | chr12:68400000-68410000 | chr12:68580000-68590000 | 180000 | H1-hESC | ESC |
| rs6581793 | EUR | 0.99002 | Within loop | chr12:68400000-68410000 | chr12:68580000-68590000 | 180000 | H1-hESC | ESC |
| rs6581793 | SAS | 0.9842 | Within loop | chr12:68400000-68410000 | chr12:68580000-68590000 | 180000 | H1-hESC | ESC |
| rs6581794 | AMR | 0.92172 | Within loop | chr12:68400000-68410000 | chr12:68580000-68590000 | 180000 | H1-hESC | ESC |
| rs6581794 | EAS | 1 | Within loop | chr12:68400000-68410000 | chr12:68580000-68590000 | 180000 | H1-hESC | ESC |
| rs6581794 | EUR | 0.99499 | Within loop | chr12:68400000-68410000 | chr12:68580000-68590000 | 180000 | H1-hESC | ESC |
| rs6581794 | SAS | 0.9842 | Within loop | chr12:68400000-68410000 | chr12:68580000-68590000 | 180000 | H1-hESC | ESC |
| rs6581795 | AMR | 1 | Within loop | chr12:68400000-68410000 | chr12:68580000-68590000 | 180000 | H1-hESC | ESC |
| rs6581795 | EUR | 0.98498 | Within loop | chr12:68400000-68410000 | chr12:68580000-68590000 | 180000 | H1-hESC | ESC |
| rs6581795 | SAS | 0.96842 | Within loop | chr12:68400000-68410000 | chr12:68580000-68590000 | 180000 | H1-hESC | ESC |
| rs7132697 | AMR | 0.98633 | Within loop | chr12:68400000-68410000 | chr12:68580000-68590000 | 180000 | H1-hESC | ESC |
| rs7132697 | EAS | 0.98603 | Within loop | chr12:68400000-68410000 | chr12:68580000-68590000 | 180000 | H1-hESC | ESC |
| rs7132697 | EUR | 0.98494 | Within loop | chr12:68400000-68410000 | chr12:68580000-68590000 | 180000 | H1-hESC | ESC |
| rs7132697 | SAS | 0.9842 | Within loop | chr12:68400000-68410000 | chr12:68580000-68590000 | 180000 | H1-hESC | ESC |
| rs7133554 | AMR | 0.98633 | Within loop | chr12:68400000-68410000 | chr12:68580000-68590000 | 180000 | H1-hESC | ESC |
| rs7133554 | EAS | 0.97205 | Within loop | chr12:68400000-68410000 | chr12:68580000-68590000 | 180000 | H1-hESC | ESC |
| rs7133554 | EUR | 0.98997 | Within loop | chr12:68400000-68410000 | chr12:68580000-68590000 | 180000 | H1-hESC | ESC |
| rs7133554 | SAS | 0.9842 | Within loop | chr12:68400000-68410000 | chr12:68580000-68590000 | 180000 | H1-hESC | ESC |
| rs7133709 | AMR | 0.9663 | Within loop | chr12:68400000-68410000 | chr12:68580000-68590000 | 180000 | H1-hESC | ESC |
| rs7133709 | EUR | 0.98498 | Within loop | chr12:68400000-68410000 | chr12:68580000-68590000 | 180000 | H1-hESC | ESC |
| rs7133709 | SAS | 0.96842 | Within loop | chr12:68400000-68410000 | chr12:68580000-68590000 | 180000 | H1-hESC | ESC |
| rs7135373 | AMR | 0.9663 | Within loop | chr12:68400000-68410000 | chr12:68580000-68590000 | 180000 | H1-hESC | ESC |
| rs7135373 | EUR | 0.98498 | Within loop | chr12:68400000-68410000 | chr12:68580000-68590000 | 180000 | H1-hESC | ESC |
| rs7135373 | SAS | 0.96062 | Within loop | chr12:68400000-68410000 | chr12:68580000-68590000 | 180000 | H1-hESC | ESC |
| rs7138107 | AMR | 0.9663 | Within loop | chr12:68400000-68410000 | chr12:68580000-68590000 | 180000 | H1-hESC | ESC |
| rs7138107 | EUR | 0.98003 | Within loop | chr12:68400000-68410000 | chr12:68580000-68590000 | 180000 | H1-hESC | ESC |
| rs7138107 | SAS | 0.96842 | Within loop | chr12:68400000-68410000 | chr12:68580000-68590000 | 180000 | H1-hESC | ESC |
| rs7139169 | AMR | 0.9095 | Within loop | chr12:68400000-68410000 | chr12:68580000-68590000 | 180000 | H1-hESC | ESC |
| rs7139169 | EUR | 0.99002 | Within loop | chr12:68400000-68410000 | chr12:68580000-68590000 | 180000 | H1-hESC | ESC |
| rs7139169 | SAS | 0.96842 | Within loop | chr12:68400000-68410000 | chr12:68580000-68590000 | 180000 | H1-hESC | ESC |
| rs72648183 | EAS | 0.9767 | Within loop | chr12:68400000-68410000 | chr12:68580000-68590000 | 180000 | H1-hESC | ESC |
| rs7302226 | AMR | 0.98633 | Within loop | chr12:68400000-68410000 | chr12:68580000-68590000 | 180000 | H1-hESC | ESC |
| rs7302226 | EAS | 0.97205 | Within loop | chr12:68400000-68410000 | chr12:68580000-68590000 | 180000 | H1-hESC | ESC |
| rs7302226 | EUR | 0.98997 | Within loop | chr12:68400000-68410000 | chr12:68580000-68590000 | 180000 | H1-hESC | ESC |
| rs7302226 | SAS | 0.9842 | Within loop | chr12:68400000-68410000 | chr12:68580000-68590000 | 180000 | H1-hESC | ESC |
| rs7302488 | AMR | 0.94684 | Within loop | chr12:68400000-68410000 | chr12:68580000-68590000 | 180000 | H1-hESC | ESC |
| rs7302488 | EUR | 0.98498 | Within loop | chr12:68400000-68410000 | chr12:68580000-68590000 | 180000 | H1-hESC | ESC |
| rs7302488 | SAS | 0.96842 | Within loop | chr12:68400000-68410000 | chr12:68580000-68590000 | 180000 | H1-hESC | ESC |
| rs7306196 | AMR | 0.95932 | Within loop | chr12:68400000-68410000 | chr12:68580000-68590000 | 180000 | H1-hESC | ESC |
| rs7306196 | EUR | 0.98498 | Within loop | chr12:68400000-68410000 | chr12:68580000-68590000 | 180000 | H1-hESC | ESC |
| rs7306196 | SAS | 0.96842 | Within loop | chr12:68400000-68410000 | chr12:68580000-68590000 | 180000 | H1-hESC | ESC |
| rs759487 | AMR | 1 | Within loop | chr12:68400000-68410000 | chr12:68580000-68590000 | 180000 | H1-hESC | ESC |
| rs759487 | EUR | 0.98498 | Within loop | chr12:68400000-68410000 | chr12:68580000-68590000 | 180000 | H1-hESC | ESC |
| rs759487 | SAS | 0.96842 | Within loop | chr12:68400000-68410000 | chr12:68580000-68590000 | 180000 | H1-hESC | ESC |
| rs759488 | EUR | 0.97025 | Within loop | chr12:68400000-68410000 | chr12:68580000-68590000 | 180000 | H1-hESC | ESC |
| rs759488 | SAS | 0.83686 | Within loop | chr12:68400000-68410000 | chr12:68580000-68590000 | 180000 | H1-hESC | ESC |
| rs7959933 | AMR | 0.93416 | Within loop | chr12:68400000-68410000 | chr12:68580000-68590000 | 180000 | H1-hESC | ESC |
| rs7959933 | EUR | 0.98003 | Within loop | chr12:68400000-68410000 | chr12:68580000-68590000 | 180000 | H1-hESC | ESC |
| rs7959933 | SAS | 0.87482 | Within loop | chr12:68400000-68410000 | chr12:68580000-68590000 | 180000 | H1-hESC | ESC |
| rs7969745 | AMR | 0.92172 | Within loop | chr12:68400000-68410000 | chr12:68580000-68590000 | 180000 | H1-hESC | ESC |
| rs7969745 | EAS | 0.97671 | Within loop | chr12:68400000-68410000 | chr12:68580000-68590000 | 180000 | H1-hESC | ESC |
| rs7969745 | EUR | 0.98495 | Within loop | chr12:68400000-68410000 | chr12:68580000-68590000 | 180000 | H1-hESC | ESC |
| rs7969745 | SAS | 0.9842 | Within loop | chr12:68400000-68410000 | chr12:68580000-68590000 | 180000 | H1-hESC | ESC |
| rs7973170 | AMR | 0.98633 | Within loop | chr12:68400000-68410000 | chr12:68580000-68590000 | 180000 | H1-hESC | ESC |
| rs7973170 | EAS | 0.98603 | Within loop | chr12:68400000-68410000 | chr12:68580000-68590000 | 180000 | H1-hESC | ESC |
| rs7973170 | EUR | 0.98494 | Within loop | chr12:68400000-68410000 | chr12:68580000-68590000 | 180000 | H1-hESC | ESC |
| rs7973170 | SAS | 0.97633 | Within loop | chr12:68400000-68410000 | chr12:68580000-68590000 | 180000 | H1-hESC | ESC |
| rs7978128 | AMR | 0.98633 | Within loop | chr12:68400000-68410000 | chr12:68580000-68590000 | 180000 | H1-hESC | ESC |
| rs7978128 | EAS | 0.99533 | Within loop | chr12:68400000-68410000 | chr12:68580000-68590000 | 180000 | H1-hESC | ESC |
| rs7978128 | EUR | 1 | Within loop | chr12:68400000-68410000 | chr12:68580000-68590000 | 180000 | H1-hESC | ESC |
| rs7978128 | SAS | 0.9842 | Within loop | chr12:68400000-68410000 | chr12:68580000-68590000 | 180000 | H1-hESC | ESC |
| rs9668812 | AMR | 0.98633 | Within loop | chr12:68400000-68410000 | chr12:68580000-68590000 | 180000 | H1-hESC | ESC |
| rs9668812 | EAS | 0.99533 | Within loop | chr12:68400000-68410000 | chr12:68580000-68590000 | 180000 | H1-hESC | ESC |
| rs9668812 | EUR | 1 | Within loop | chr12:68400000-68410000 | chr12:68580000-68590000 | 180000 | H1-hESC | ESC |
| rs9668812 | SAS | 0.9842 | Within loop | chr12:68400000-68410000 | chr12:68580000-68590000 | 180000 | H1-hESC | ESC |
| rs9888400 | AMR | 0.94047 | Within loop | chr12:68400000-68410000 | chr12:68580000-68590000 | 180000 | H1-hESC | ESC |
| rs9888400 | EUR | 0.97512 | Within loop | chr12:68400000-68410000 | chr12:68580000-68590000 | 180000 | H1-hESC | ESC |
| rs9888400 | SAS | 0.92929 | Within loop | chr12:68400000-68410000 | chr12:68580000-68590000 | 180000 | H1-hESC | ESC |

African: AFR, Ad Mixed American: AMR, East Asian: ASN, European: EUR, and South Asian: SAS.

| **Supplemental Table 8. The rs2069718 associated and interacted single nucleotide polymorphisms (SNPs) through three-dimensional (3D) chromatin looping (LD r2 > 0.8).** | | | | | | | | |
| --- | --- | --- | --- | --- | --- | --- | --- | --- |
| **SNP ID** | **Population** | **LD(r2)** | **Loop type** | **Loop start** | **Loop end** | **Distance** | **Cell type** | **Tissue** |
| rs1076025 | AMR | 0.8509 | Within loop | chr12:68400000-68410000 | chr12:68580000-68590000 | 180000 | H1-hESC | ESC |
| rs1076025 | EUR | 0.90684 | Within loop | chr12:68400000-68410000 | chr12:68580000-68590000 | 180000 | H1-hESC | ESC |
| rs10878756 | AMR | 0.88923 | Within loop | chr12:68400000-68410000 | chr12:68580000-68590000 | 180000 | H1-hESC | ESC |
| rs10878756 | EAS | 0.92873 | Within loop | chr12:68400000-68410000 | chr12:68580000-68590000 | 180000 | H1-hESC | ESC |
| rs10878756 | EUR | 0.8987 | Within loop | chr12:68400000-68410000 | chr12:68580000-68590000 | 180000 | H1-hESC | ESC |
| rs12312186 | AMR | 0.8355 | Within loop | chr12:68400000-68410000 | chr12:68580000-68590000 | 180000 | H1-hESC | ESC |
| rs12312186 | EUR | 0.90684 | Within loop | chr12:68400000-68410000 | chr12:68580000-68590000 | 180000 | H1-hESC | ESC |
| rs12313214 | AMR | 0.98122 | Within loop | chr12:68400000-68410000 | chr12:68580000-68590000 | 180000 | H1-hESC | ESC |
| rs12313214 | EAS | 0.9355 | Within loop | chr12:68400000-68410000 | chr12:68580000-68590000 | 180000 | H1-hESC | ESC |
| rs12313214 | EUR | 0.97523 | Within loop | chr12:68400000-68410000 | chr12:68580000-68590000 | 180000 | H1-hESC | ESC |
| rs12313214 | SAS | 0.97111 | Within loop | chr12:68400000-68410000 | chr12:68580000-68590000 | 180000 | H1-hESC | ESC |
| rs12315837 | AMR | 0.83044 | Within loop | chr12:68400000-68410000 | chr12:68580000-68590000 | 180000 | H1-hESC | ESC |
| rs12315837 | EUR | 0.90684 | Within loop | chr12:68400000-68410000 | chr12:68580000-68590000 | 180000 | H1-hESC | ESC |
| rs2041864 | AMR | 0.98751 | Within loop | chr12:68400000-68410000 | chr12:68580000-68590000 | 180000 | H1-hESC | ESC |
| rs2041864 | EAS | 0.98526 | Within loop | chr12:68400000-68410000 | chr12:68580000-68590000 | 180000 | H1-hESC | ESC |
| rs2041864 | EUR | 0.98757 | Within loop | chr12:68400000-68410000 | chr12:68580000-68590000 | 180000 | H1-hESC | ESC |
| rs2041864 | SAS | 0.99586 | Within loop | chr12:68400000-68410000 | chr12:68580000-68590000 | 180000 | H1-hESC | ESC |
| rs2058739 | EUR | 0.90234 | Within loop | chr12:68400000-68410000 | chr12:68580000-68590000 | 180000 | H1-hESC | ESC |
| rs2069727 | EAS | 0.98526 | Within loop | chr12:68400000-68410000 | chr12:68580000-68590000 | 180000 | H1-hESC | ESC |
| rs2069727 | SAS | 0.8102 | Within loop | chr12:68400000-68410000 | chr12:68580000-68590000 | 180000 | H1-hESC | ESC |
| rs2080414 | AMR | 0.83044 | Within loop | chr12:68400000-68410000 | chr12:68580000-68590000 | 180000 | H1-hESC | ESC |
| rs2080414 | EUR | 0.90684 | Within loop | chr12:68400000-68410000 | chr12:68580000-68590000 | 180000 | H1-hESC | ESC |
| rs2193046 | EAS | 0.97052 | Within loop | chr12:68400000-68410000 | chr12:68580000-68590000 | 180000 | H1-hESC | ESC |
| rs2216164 | AMR | 0.98751 | Within loop | chr12:68400000-68410000 | chr12:68580000-68590000 | 180000 | H1-hESC | ESC |
| rs2216164 | EAS | 0.97788 | Within loop | chr12:68400000-68410000 | chr12:68580000-68590000 | 180000 | H1-hESC | ESC |
| rs2216164 | EUR | 0.98757 | Within loop | chr12:68400000-68410000 | chr12:68580000-68590000 | 180000 | H1-hESC | ESC |
| rs2216164 | SAS | 0.9876 | Within loop | chr12:68400000-68410000 | chr12:68580000-68590000 | 180000 | H1-hESC | ESC |
| rs2430561 | EAS | 0.99262 | Within loop | chr12:68400000-68410000 | chr12:68580000-68590000 | 180000 | H1-hESC | ESC |
| rs2430561 | SAS | 0.80327 | Within loop | chr12:68400000-68410000 | chr12:68580000-68590000 | 180000 | H1-hESC | ESC |
| rs2870951 | AMR | 0.83463 | Within loop | chr12:68400000-68410000 | chr12:68580000-68590000 | 180000 | H1-hESC | ESC |
| rs2870951 | EUR | 0.94233 | Within loop | chr12:68400000-68410000 | chr12:68580000-68590000 | 180000 | H1-hESC | ESC |
| rs35314021 | EAS | 0.84371 | Within loop | chr12:68400000-68410000 | chr12:68580000-68590000 | 180000 | H1-hESC | ESC |
| rs4913277 | EUR | 0.89816 | Within loop | chr12:68400000-68410000 | chr12:68580000-68590000 | 180000 | H1-hESC | ESC |
| rs4913416 | EUR | 0.90234 | Within loop | chr12:68400000-68410000 | chr12:68580000-68590000 | 180000 | H1-hESC | ESC |
| rs7137814 | AMR | 0.8509 | Within loop | chr12:68400000-68410000 | chr12:68580000-68590000 | 180000 | H1-hESC | ESC |
| rs7137814 | EUR | 0.90684 | Within loop | chr12:68400000-68410000 | chr12:68580000-68590000 | 180000 | H1-hESC | ESC |
| rs7137993 | AMR | 0.8509 | Within loop | chr12:68400000-68410000 | chr12:68580000-68590000 | 180000 | H1-hESC | ESC |
| rs7137993 | EUR | 0.90684 | Within loop | chr12:68400000-68410000 | chr12:68580000-68590000 | 180000 | H1-hESC | ESC |
| rs7297259 | EUR | 0.88566 | Within loop | chr12:68400000-68410000 | chr12:68580000-68590000 | 180000 | H1-hESC | ESC |
| rs7298410 | EUR | 0.90234 | Within loop | chr12:68400000-68410000 | chr12:68580000-68590000 | 180000 | H1-hESC | ESC |
| rs7304531 | AMR | 0.98122 | Within loop | chr12:68400000-68410000 | chr12:68580000-68590000 | 180000 | H1-hESC | ESC |
| rs7304531 | EAS | 0.9355 | Within loop | chr12:68400000-68410000 | chr12:68580000-68590000 | 180000 | H1-hESC | ESC |
| rs7304531 | EUR | 0.97932 | Within loop | chr12:68400000-68410000 | chr12:68580000-68590000 | 180000 | H1-hESC | ESC |
| rs7304531 | SAS | 0.96296 | Within loop | chr12:68400000-68410000 | chr12:68580000-68590000 | 180000 | H1-hESC | ESC |
| rs7954499 | EAS | 0.99262 | Within loop | chr12:68400000-68410000 | chr12:68580000-68590000 | 180000 | H1-hESC | ESC |
| rs7954499 | SAS | 0.8102 | Within loop | chr12:68400000-68410000 | chr12:68580000-68590000 | 180000 | H1-hESC | ESC |
| rs7956817 | AMR | 0.83044 | Within loop | chr12:68400000-68410000 | chr12:68580000-68590000 | 180000 | H1-hESC | ESC |
| rs7956817 | EUR | 0.90684 | Within loop | chr12:68400000-68410000 | chr12:68580000-68590000 | 180000 | H1-hESC | ESC |
| rs7968411 | AMR | 0.88895 | Within loop | chr12:68400000-68410000 | chr12:68580000-68590000 | 180000 | H1-hESC | ESC |
| rs7968411 | EUR | 0.95055 | Within loop | chr12:68400000-68410000 | chr12:68580000-68590000 | 180000 | H1-hESC | ESC |
| rs7968411 | SAS | 0.90992 | Within loop | chr12:68400000-68410000 | chr12:68580000-68590000 | 180000 | H1-hESC | ESC |
| rs9888319 | AMR | 0.82382 | Within loop | chr12:68400000-68410000 | chr12:68580000-68590000 | 180000 | H1-hESC | ESC |
| rs9888319 | EUR | 0.90234 | Within loop | chr12:68400000-68410000 | chr12:68580000-68590000 | 180000 | H1-hESC | ESC |
| rs9888402 | AMR | 0.82382 | Within loop | chr12:68400000-68410000 | chr12:68580000-68590000 | 180000 | H1-hESC | ESC |
| rs9888402 | EUR | 0.90234 | Within loop | chr12:68400000-68410000 | chr12:68580000-68590000 | 180000 | H1-hESC | ESC |

African: AFR, Ad Mixed American: AMR, East Asian: ASN, European: EUR, and South Asian: SAS.

| **Supplemental Table 9. The rs9376267 associated and interacted single nucleotide polymorphisms (SNPs) through three-dimensional (3D) chromatin looping (LD r2 > 0.8).** | | | | | | | | |
| --- | --- | --- | --- | --- | --- | --- | --- | --- |
| **SNP ID** | **Population** | **LD(r2)** | **Loop type** | **Loop start** | **Loop end** | **Distance** | **Cell type** | **Tissue** |
| rs150776768 | AMR | 0.84585 | Within loop | chr6:137420000-137425000 | chr6:137535000-137540000 | 115000 | GM12878 | Blood |
| rs150776768 | EUR | 0.94843 | Within loop | chr6:137420000-137425000 | chr6:137535000-137540000 | 115000 | GM12878 | Blood |
| rs376706088 | EUR | 0.91313 | Within loop | chr6:137420000-137425000 | chr6:137535000-137540000 | 115000 | GM12878 | Blood |
| rs542331996 | AMR | 0.81405 | Within loop | chr6:137420000-137425000 | chr6:137535000-137540000 | 115000 | GM12878 | Blood |
| rs542331996 | EUR | 0.9172 | Within loop | chr6:137420000-137425000 | chr6:137535000-137540000 | 115000 | GM12878 | Blood |
| rs56251346 | AMR | 0.85417 | Within loop | chr6:137420000-137425000 | chr6:137535000-137540000 | 115000 | GM12878 | Blood |
| rs56251346 | EUR | 0.95352 | Within loop | chr6:137420000-137425000 | chr6:137535000-137540000 | 115000 | GM12878 | Blood |
| rs75537328 | AMR | 0.90072 | Within loop | chr6:137420000-137425000 | chr6:137535000-137540000 | 115000 | GM12878 | Blood |
| rs75537328 | EAS | 0.89969 | Within loop | chr6:137420000-137425000 | chr6:137535000-137540000 | 115000 | GM12878 | Blood |
| rs75537328 | EUR | 0.93 | Within loop | chr6:137420000-137425000 | chr6:137535000-137540000 | 115000 | GM12878 | Blood |
| rs75537328 | SAS | 0.93012 | Within loop | chr6:137420000-137425000 | chr6:137535000-137540000 | 115000 | GM12878 | Blood |
| rs7759040 | AMR | 0.96857 | Within loop | chr6:137420000-137425000 | chr6:137535000-137540000 | 115000 | GM12878 | Blood |
| rs7759040 | EAS | 0.94902 | Within loop | chr6:137420000-137425000 | chr6:137535000-137540000 | 115000 | GM12878 | Blood |
| rs7759040 | EUR | 0.99478 | Within loop | chr6:137420000-137425000 | chr6:137535000-137540000 | 115000 | GM12878 | Blood |
| rs7759040 | SAS | 1 | Within loop | chr6:137420000-137425000 | chr6:137535000-137540000 | 115000 | GM12878 | Blood |
| rs9376268 | AMR | 0.85417 | Within loop | chr6:137420000-137425000 | chr6:137535000-137540000 | 115000 | GM12878 | Blood |
| rs9376268 | EUR | 0.95352 | Within loop | chr6:137420000-137425000 | chr6:137535000-137540000 | 115000 | GM12878 | Blood |
| rs9376269 | AMR | 0.98414 | Within loop | chr6:137420000-137425000 | chr6:137535000-137540000 | 115000 | GM12878 | Blood |
| rs9376269 | EAS | 0.95307 | Within loop | chr6:137420000-137425000 | chr6:137535000-137540000 | 115000 | GM12878 | Blood |
| rs9376269 | EUR | 0.98435 | Within loop | chr6:137420000-137425000 | chr6:137535000-137540000 | 115000 | GM12878 | Blood |
| rs9376269 | SAS | 0.99171 | Within loop | chr6:137420000-137425000 | chr6:137535000-137540000 | 115000 | GM12878 | Blood |
| rs9389480 | AMR | 0.85417 | Within loop | chr6:137420000-137425000 | chr6:137535000-137540000 | 115000 | GM12878 | Blood |
| rs9389480 | EUR | 0.95352 | Within loop | chr6:137420000-137425000 | chr6:137535000-137540000 | 115000 | GM12878 | Blood |
| rs9389484 | AMR | 0.85417 | Within loop | chr6:137420000-137425000 | chr6:137535000-137540000 | 115000 | GM12878 | Blood |
| rs9389484 | EUR | 0.95352 | Within loop | chr6:137420000-137425000 | chr6:137535000-137540000 | 115000 | GM12878 | Blood |
| rs9402879 | AMR | 0.85417 | Within loop | chr6:137420000-137425000 | chr6:137535000-137540000 | 115000 | GM12878 | Blood |
| rs9402879 | EUR | 0.95863 | Within loop | chr6:137420000-137425000 | chr6:137535000-137540000 | 115000 | GM12878 | Blood |

African: AFR, Ad Mixed American: AMR, East Asian: ASN, European: EUR, and South Asian: SAS.

| **Supplemental Table 10. The rs9376268 associated and interacted single nucleotide polymorphisms (SNPs) through three-dimensional (3D) chromatin looping (LD r2 > 0.8).** | | | | | | | | |
| --- | --- | --- | --- | --- | --- | --- | --- | --- |
| **SNP ID** | **Population** | **LD(r2)** | **Loop type** | **Loop start** | **Loop end** | **Distance** | **Cell type** | **Tissue** |
| rs150776768 | AMR | 0.99139 | Within loop | chr6:137420000-137425000 | chr6:137535000-137540000 | 115000 | GM12878 | Blood |
| rs150776768 | EAS | 0.80795 | Within loop | chr6:137420000-137425000 | chr6:137535000-137540000 | 115000 | GM12878 | Blood |
| rs150776768 | EUR | 0.99466 | Within loop | chr6:137420000-137425000 | chr6:137535000-137540000 | 115000 | GM12878 | Blood |
| rs150776768 | SAS | 0.99459 | Within loop | chr6:137420000-137425000 | chr6:137535000-137540000 | 115000 | GM12878 | Blood |
| rs376706088 | AMR | 0.91406 | Within loop | chr6:137420000-137425000 | chr6:137535000-137540000 | 115000 | GM12878 | Blood |
| rs376706088 | EAS | 0.97538 | Within loop | chr6:137420000-137425000 | chr6:137535000-137540000 | 115000 | GM12878 | Blood |
| rs376706088 | EUR | 0.94698 | Within loop | chr6:137420000-137425000 | chr6:137535000-137540000 | 115000 | GM12878 | Blood |
| rs376706088 | SAS | 0.96763 | Within loop | chr6:137420000-137425000 | chr6:137535000-137540000 | 115000 | GM12878 | Blood |
| rs542331996 | AMR | 0.95748 | Within loop | chr6:137420000-137425000 | chr6:137535000-137540000 | 115000 | GM12878 | Blood |
| rs542331996 | EAS | 0.95521 | Within loop | chr6:137420000-137425000 | chr6:137535000-137540000 | 115000 | GM12878 | Blood |
| rs542331996 | EUR | 0.95249 | Within loop | chr6:137420000-137425000 | chr6:137535000-137540000 | 115000 | GM12878 | Blood |
| rs542331996 | SAS | 0.92564 | Within loop | chr6:137420000-137425000 | chr6:137535000-137540000 | 115000 | GM12878 | Blood |
| rs56251346 | AMR | 1 | Within loop | chr6:137420000-137425000 | chr6:137535000-137540000 | 115000 | GM12878 | Blood |
| rs56251346 | EAS | 0.96769 | Within loop | chr6:137420000-137425000 | chr6:137535000-137540000 | 115000 | GM12878 | Blood |
| rs56251346 | EUR | 1 | Within loop | chr6:137420000-137425000 | chr6:137535000-137540000 | 115000 | GM12878 | Blood |
| rs56251346 | SAS | 0.9892 | Within loop | chr6:137420000-137425000 | chr6:137535000-137540000 | 115000 | GM12878 | Blood |
| rs75537328 | AMR | 0.80856 | Within loop | chr6:137420000-137425000 | chr6:137535000-137540000 | 115000 | GM12878 | Blood |
| rs75537328 | EUR | 0.89639 | Within loop | chr6:137420000-137425000 | chr6:137535000-137540000 | 115000 | GM12878 | Blood |
| rs7759040 | AMR | 0.84075 | Within loop | chr6:137420000-137425000 | chr6:137535000-137540000 | 115000 | GM12878 | Blood |
| rs7759040 | EUR | 0.95853 | Within loop | chr6:137420000-137425000 | chr6:137535000-137540000 | 115000 | GM12878 | Blood |
| rs9376267 | AMR | 0.85417 | Within loop | chr6:137420000-137425000 | chr6:137535000-137540000 | 115000 | GM12878 | Blood |
| rs9376267 | EUR | 0.95352 | Within loop | chr6:137420000-137425000 | chr6:137535000-137540000 | 115000 | GM12878 | Blood |
| rs9376269 | AMR | 0.83843 | Within loop | chr6:137420000-137425000 | chr6:137535000-137540000 | 115000 | GM12878 | Blood |
| rs9376269 | EUR | 0.9481 | Within loop | chr6:137420000-137425000 | chr6:137535000-137540000 | 115000 | GM12878 | Blood |
| rs9389480 | AMR | 1 | Within loop | chr6:137420000-137425000 | chr6:137535000-137540000 | 115000 | GM12878 | Blood |
| rs9389480 | EAS | 0.96352 | Within loop | chr6:137420000-137425000 | chr6:137535000-137540000 | 115000 | GM12878 | Blood |
| rs9389480 | EUR | 1 | Within loop | chr6:137420000-137425000 | chr6:137535000-137540000 | 115000 | GM12878 | Blood |
| rs9389480 | SAS | 0.9892 | Within loop | chr6:137420000-137425000 | chr6:137535000-137540000 | 115000 | GM12878 | Blood |
| rs9389484 | AMR | 1 | Within loop | chr6:137420000-137425000 | chr6:137535000-137540000 | 115000 | GM12878 | Blood |
| rs9389484 | EAS | 0.9795 | Within loop | chr6:137420000-137425000 | chr6:137535000-137540000 | 115000 | GM12878 | Blood |
| rs9389484 | EUR | 1 | Within loop | chr6:137420000-137425000 | chr6:137535000-137540000 | 115000 | GM12878 | Blood |
| rs9389484 | SAS | 0.99459 | Within loop | chr6:137420000-137425000 | chr6:137535000-137540000 | 115000 | GM12878 | Blood |
| rs9402879 | AMR | 1 | Within loop | chr6:137420000-137425000 | chr6:137535000-137540000 | 115000 | GM12878 | Blood |
| rs9402879 | EAS | 0.9795 | Within loop | chr6:137420000-137425000 | chr6:137535000-137540000 | 115000 | GM12878 | Blood |
| rs9402879 | EUR | 0.99467 | Within loop | chr6:137420000-137425000 | chr6:137535000-137540000 | 115000 | GM12878 | Blood |
| rs9402879 | SAS | 0.98919 | Within loop | chr6:137420000-137425000 | chr6:137535000-137540000 | 115000 | GM12878 | Blood |

African: AFR, Ad Mixed American: AMR, East Asian: ASN, European: EUR, and South Asian: SAS.

| **Supplemental Table 11. The rs10457655 associated and interacted single nucleotide polymorphisms (SNPs) through three-dimensional (3D) chromatin looping (LD r2 > 0.8).** | | | | | | | | |
| --- | --- | --- | --- | --- | --- | --- | --- | --- |
| **SNP ID** | **Population** | **LD(r2)** | **Loop type** | **Loop start** | **Loop end** | **Distance** | **Cell type** | **Tissue** |
| rs11914 | EAS | 0.9313 | Within loop | chr6:137420000-137425000 | chr6:137535000-137540000 | 115000 | GM12878 | Blood |
| rs11914 | EUR | 0.96168 | Within loop | chr6:137420000-137425000 | chr6:137535000-137540000 | 115000 | GM12878 | Blood |
| rs11914 | SAS | 0.95785 | Within loop | chr6:137420000-137425000 | chr6:137535000-137540000 | 115000 | GM12878 | Blood |
| rs1327475 | EAS | 0.9313 | Within loop | chr6:137420000-137425000 | chr6:137535000-137540000 | 115000 | GM12878 | Blood |
| rs1327475 | EUR | 0.95407 | Within loop | chr6:137420000-137425000 | chr6:137535000-137540000 | 115000 | GM12878 | Blood |
| rs1327475 | SAS | 0.95785 | Within loop | chr6:137420000-137425000 | chr6:137535000-137540000 | 115000 | GM12878 | Blood |
| rs17175127 | EAS | 0.9313 | Within loop | chr6:137420000-137425000 | chr6:137535000-137540000 | 115000 | GM12878 | Blood |
| rs17175127 | EUR | 0.95407 | Within loop | chr6:137420000-137425000 | chr6:137535000-137540000 | 115000 | GM12878 | Blood |
| rs17175127 | SAS | 0.95785 | Within loop | chr6:137420000-137425000 | chr6:137535000-137540000 | 115000 | GM12878 | Blood |
| rs6928015 | EAS | 0.87433 | Within loop | chr6:137420000-137425000 | chr6:137535000-137540000 | 115000 | GM12878 | Blood |
| rs6928015 | EUR | 0.95446 | Within loop | chr6:137420000-137425000 | chr6:137535000-137540000 | 115000 | GM12878 | Blood |
| rs6928015 | SAS | 0.83612 | Within loop | chr6:137420000-137425000 | chr6:137535000-137540000 | 115000 | GM12878 | Blood |

African: AFR, Ad Mixed American: AMR, East Asian: ASN, European: EUR, and South Asian: SAS.

**Supplemental Table 12. Internal validation of the established nomogram.**

| Ntraining : Nvalidation | Training cohort | |  | Validation cohort | |
| --- | --- | --- | --- | --- | --- |
| C-index (95%CI) | AUC (95%CI) | C-index (95%CI) | AUC (95%CI) |
| 7 : 3 | 0.656 (0.573-0.739) | 0.656 (0.572-0.739) | 0.637 (0.507-0.767) | 0.637 (0.505-0.770) |
| 6 : 4 | 0.640 (0.549-0.731) | 0.641 (0.549-0.733) | 0.610 (0.492-0.728) | 0.609 (0.491-0.728) |
| 5 : 5 | 0.619 (0.517-0.721) | 0.619 (0.517-0.721) | 0.658 (0.559-0.757) | 0.658 (0.558-0.757) |
| 4 : 6 | 0.616 (0.504-0.728) | 0.616 (0.503-0.729) | 0.664 (0.573-0.755) | 0.664 (0.572-0.756) |
| 3 : 7 | 0.651 (0.526-0.776) | 0.651 (0.524-0.777) | 0.636 (0.551-0.721) | 0.636 (0.550-0.722) |

AUC: area under the receiver operating characteristic curve; CI: confidence interval; N: number.
